# Supplementary material for: CD58 defines regulatory macrophages within the tumor microenvironment
Source: PubMed Central journal article supplement — Commun Biol. 2024 Aug 21;7:1025. doi: 10.1038/s42003-024-06712-6 (PMC11335740; doi:10.1038/s42003-024-06712-6), 2024-08-21

**Figure 1F**

CD58

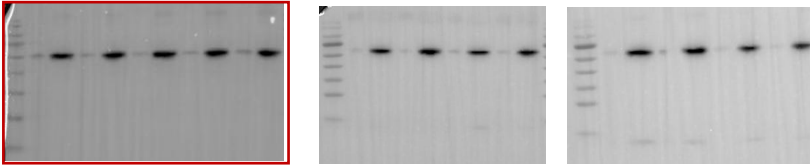

Actin

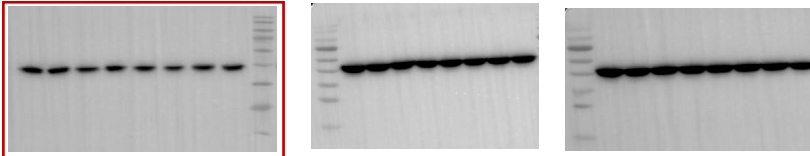

**Figure 2E**

CD58

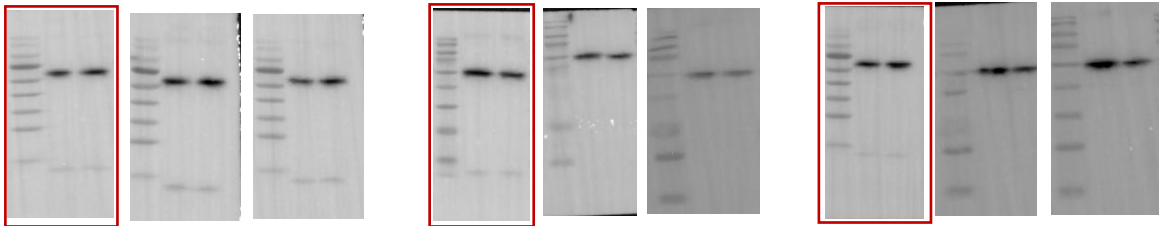

Actin

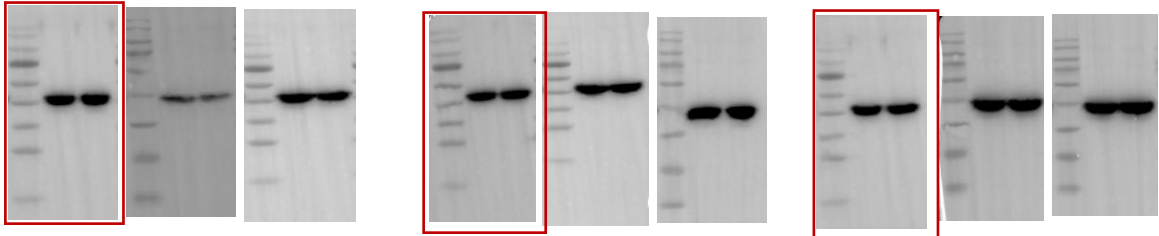

CD58

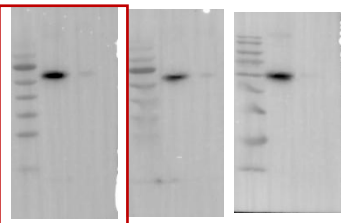

Actin

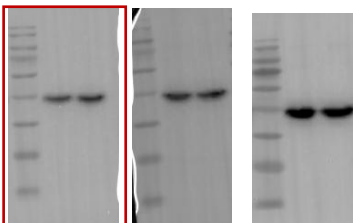

Figure 3C

CD58

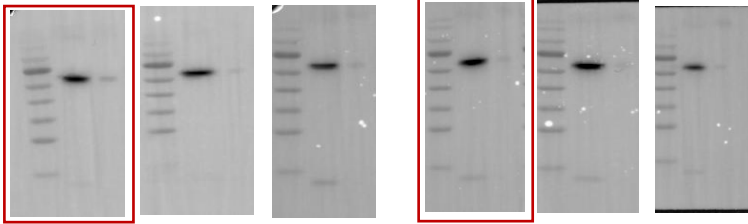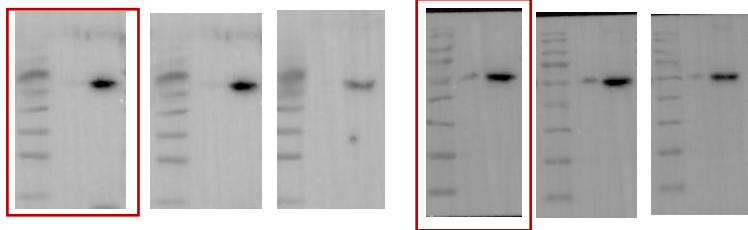

CD274

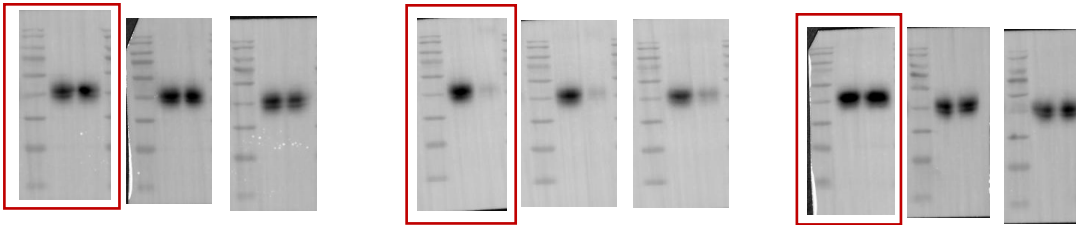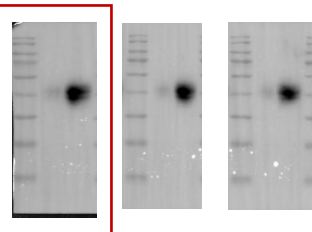

Actin

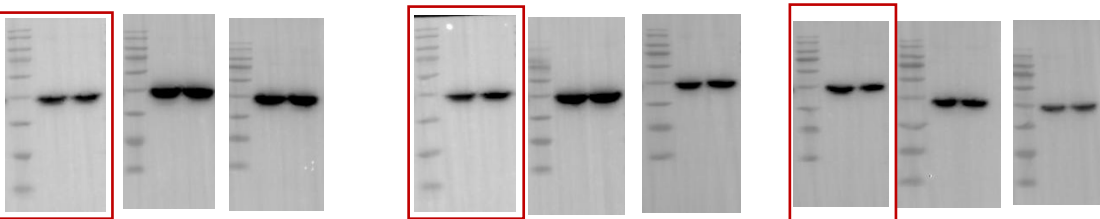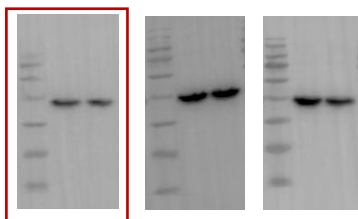

**Figure 3D**

CD58

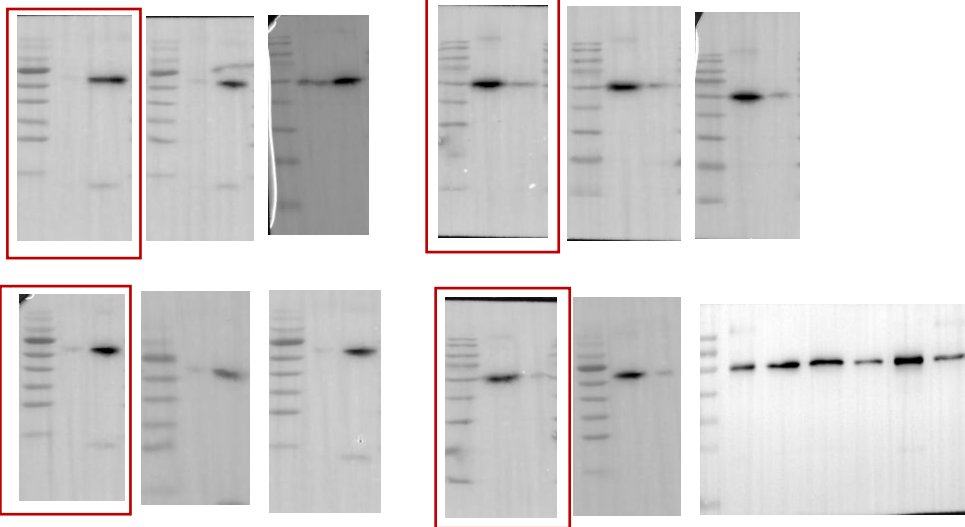

CD274

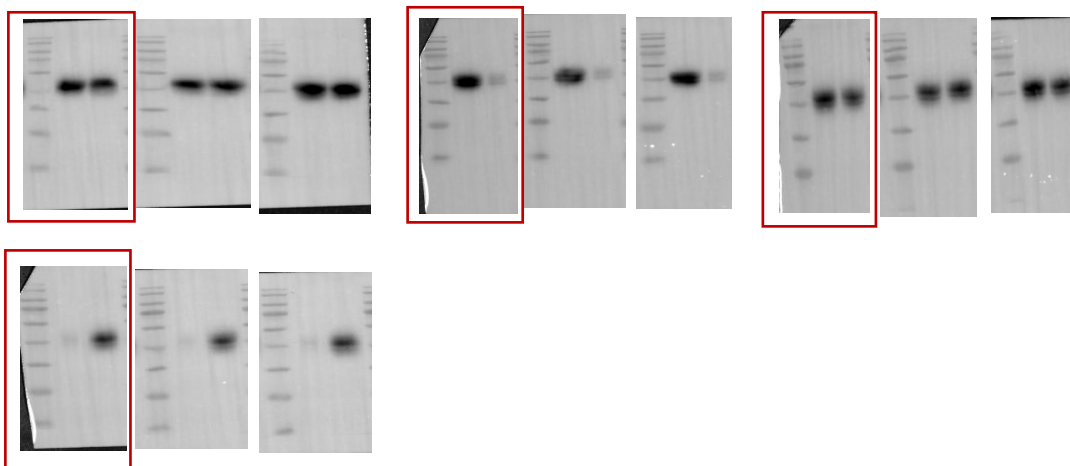

Actin

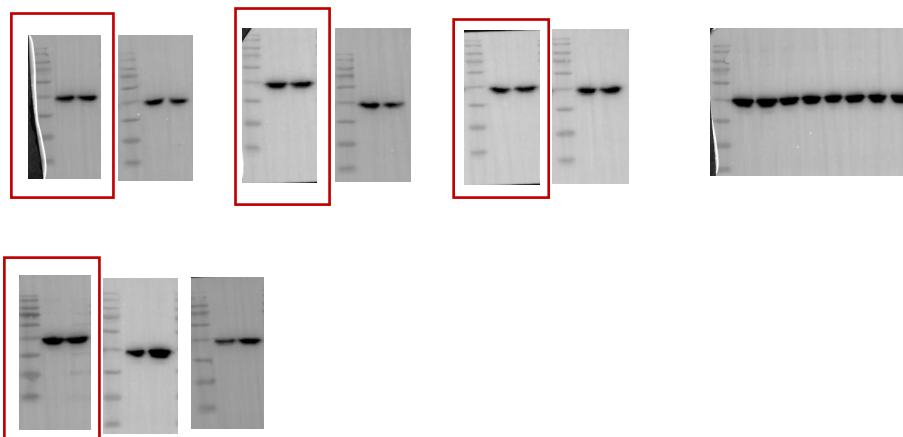

**Figure 7B**

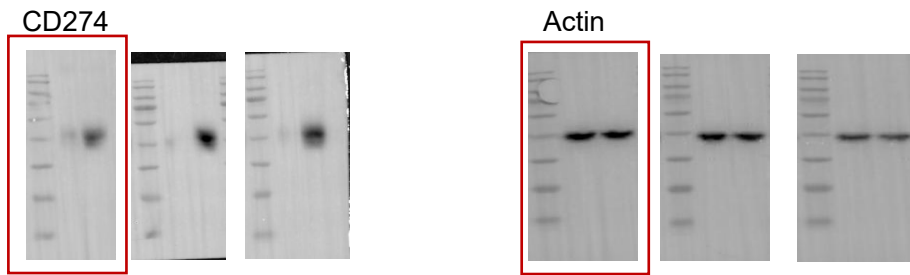

**Figure 7D**

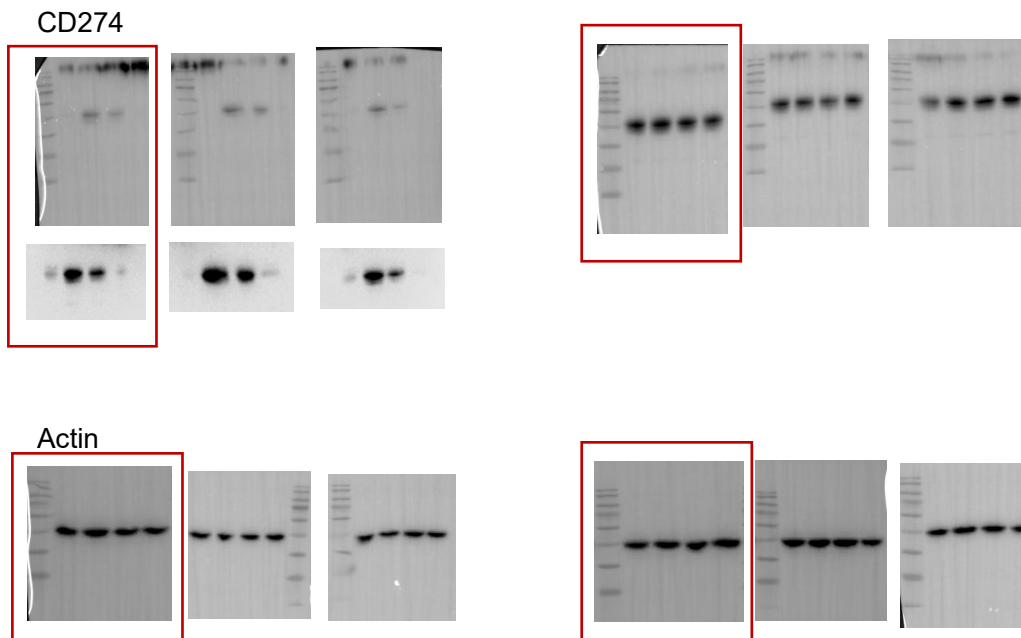

**Supplement figure 1**

a, IP

PD-L1

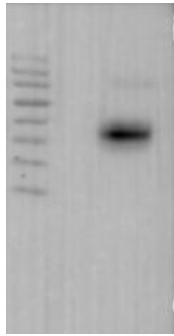

CD58

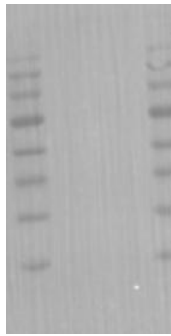

IB

PD-L1

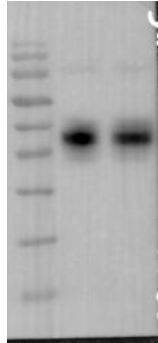

CD58

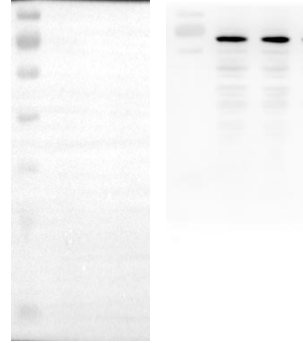

b, IP

PD-L1

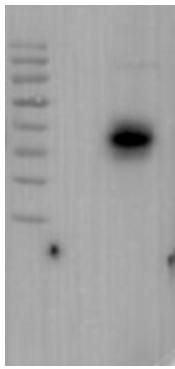

CD58

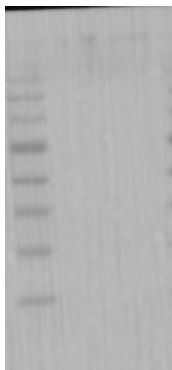

IB

PD-L1

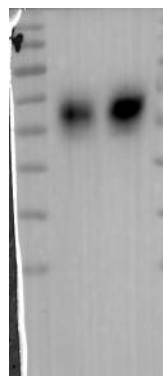

CD58

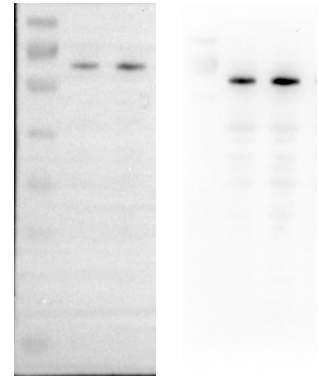

c, IP

CD58

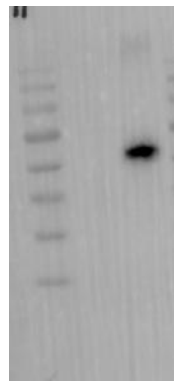

PD-L1

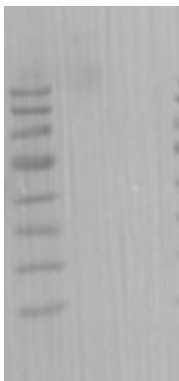

IB

CD58

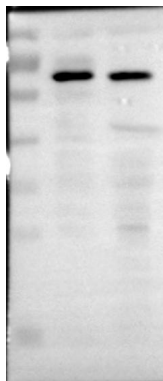

PD-L1

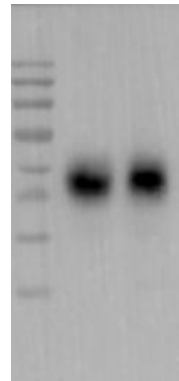

d, IP

CD58

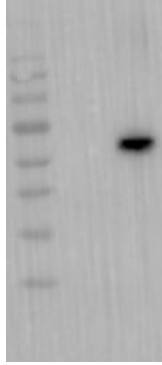

PD-L1

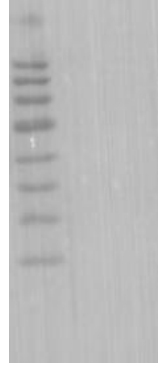

IB

CD58

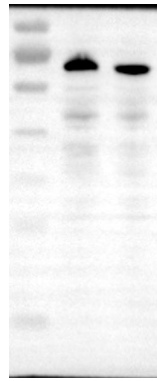

PD-L1

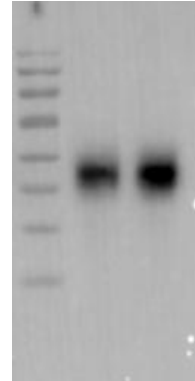

Supplement: 42003_2024_6712_MOESM6_ESM.pdf [file 42003_2024_6712_MOESM6_ESM.pdf]
