# Supplementary material for: CD58 defines regulatory macrophages within the tumor microenvironment
Source: PubMed Central journal article supplement — Commun Biol. 2024 Aug 21;7:1025. doi: 10.1038/s42003-024-06712-6 (PMC11335740; doi:10.1038/s42003-024-06712-6), 2024-08-21

**Supplement Figure 1: No interaction between CD58 and PD-L1 in glioma cells. a-d:**

The interaction between CD58 and PD-L1 in glioma cells (U251 and U373) was analyzed using Co-IP experiments.

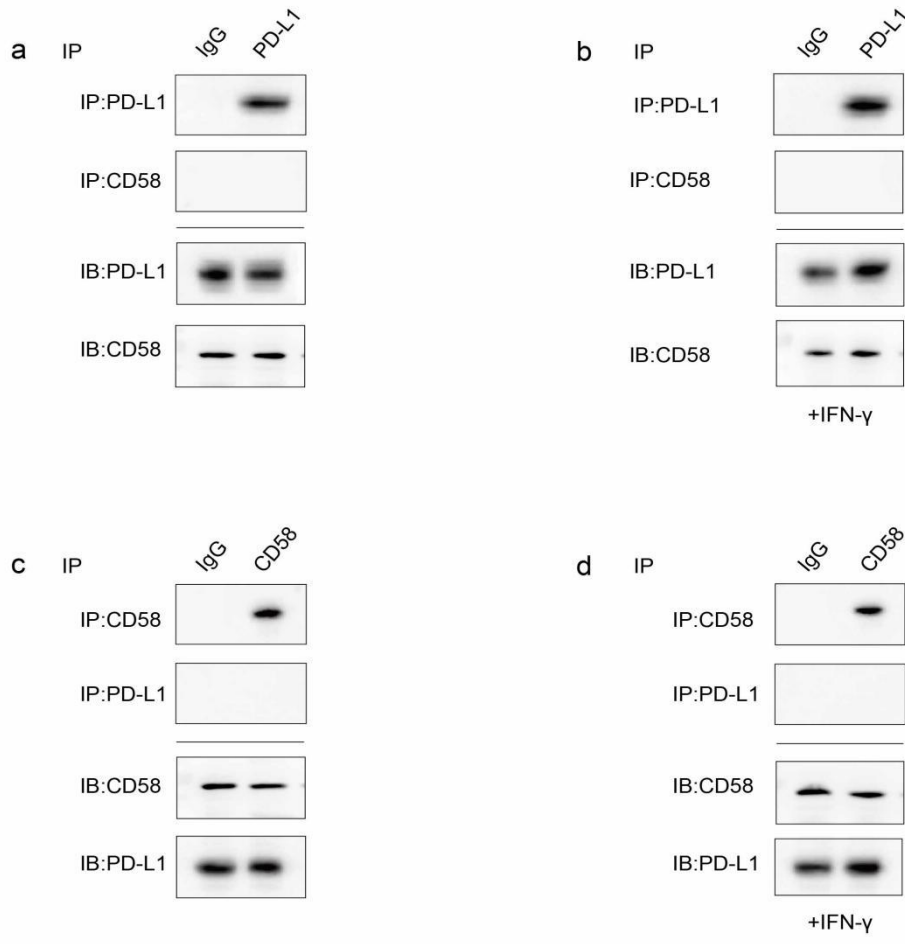

**Supplement Figure 2 : Schematic diagram.** CD58<sup>high</sup> glioma triggers macrophage polarization by secreting CXCL5, leading to the modulation of PD-L1 expression in CD58<sup>high</sup> glioma through IL-6 release.

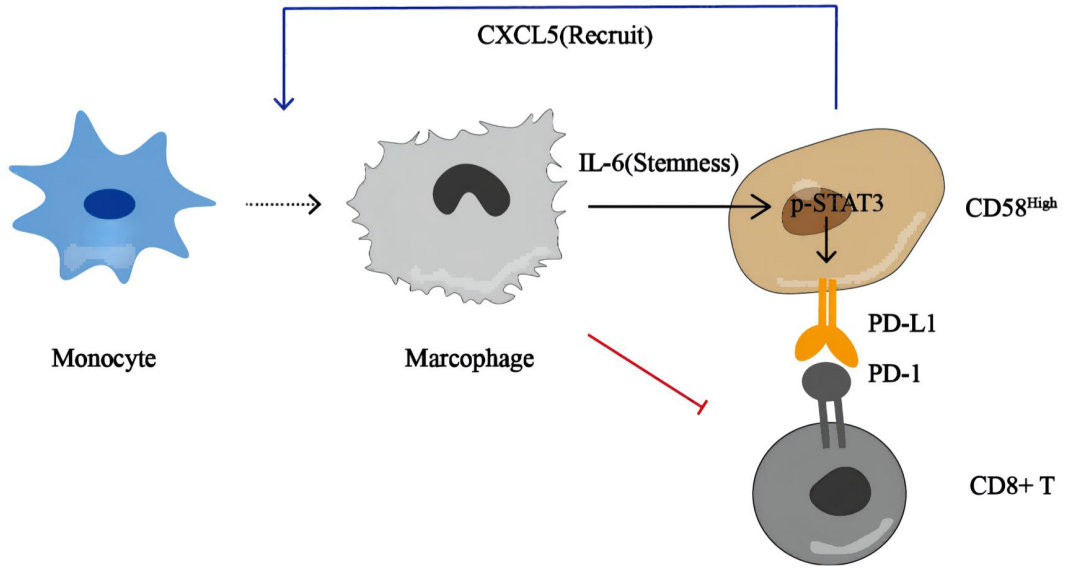

Supplement: 42003_2024_6712_MOESM1_ESM.pdf [file 42003_2024_6712_MOESM1_ESM.pdf]
