# Supplementary material for: CD58 defines regulatory macrophages within the tumor microenvironment
Source: PubMed Central journal article supplement — Commun Biol. 2024 Aug 21;7:1025. doi: 10.1038/s42003-024-06712-6 (PMC11335740; doi:10.1038/s42003-024-06712-6), 2024-08-21
Supplement: 42003_2024_6712_MOESM2_ESM.pdf [file 42003_2024_6712_MOESM2_ESM.pdf]

## Description of Additional Supplementary Files

**File name:** Supplementary Data 1-3

**Description:** The source data behind the graphs in the paper

**File name:** Supplementary Data 4

**Description:** flow cytometry plots

**File name:** Supplementary Data 5

**Description:** uncropped blots
