# Supplementary material for: CD58 defines regulatory macrophages within the tumor microenvironment
Source: PubMed Central journal article supplement — Commun Biol. 2024 Aug 21;7:1025. doi: 10.1038/s42003-024-06712-6 (PMC11335740; doi:10.1038/s42003-024-06712-6), 2024-08-21

## Flow cytometry (FACS) plots 1

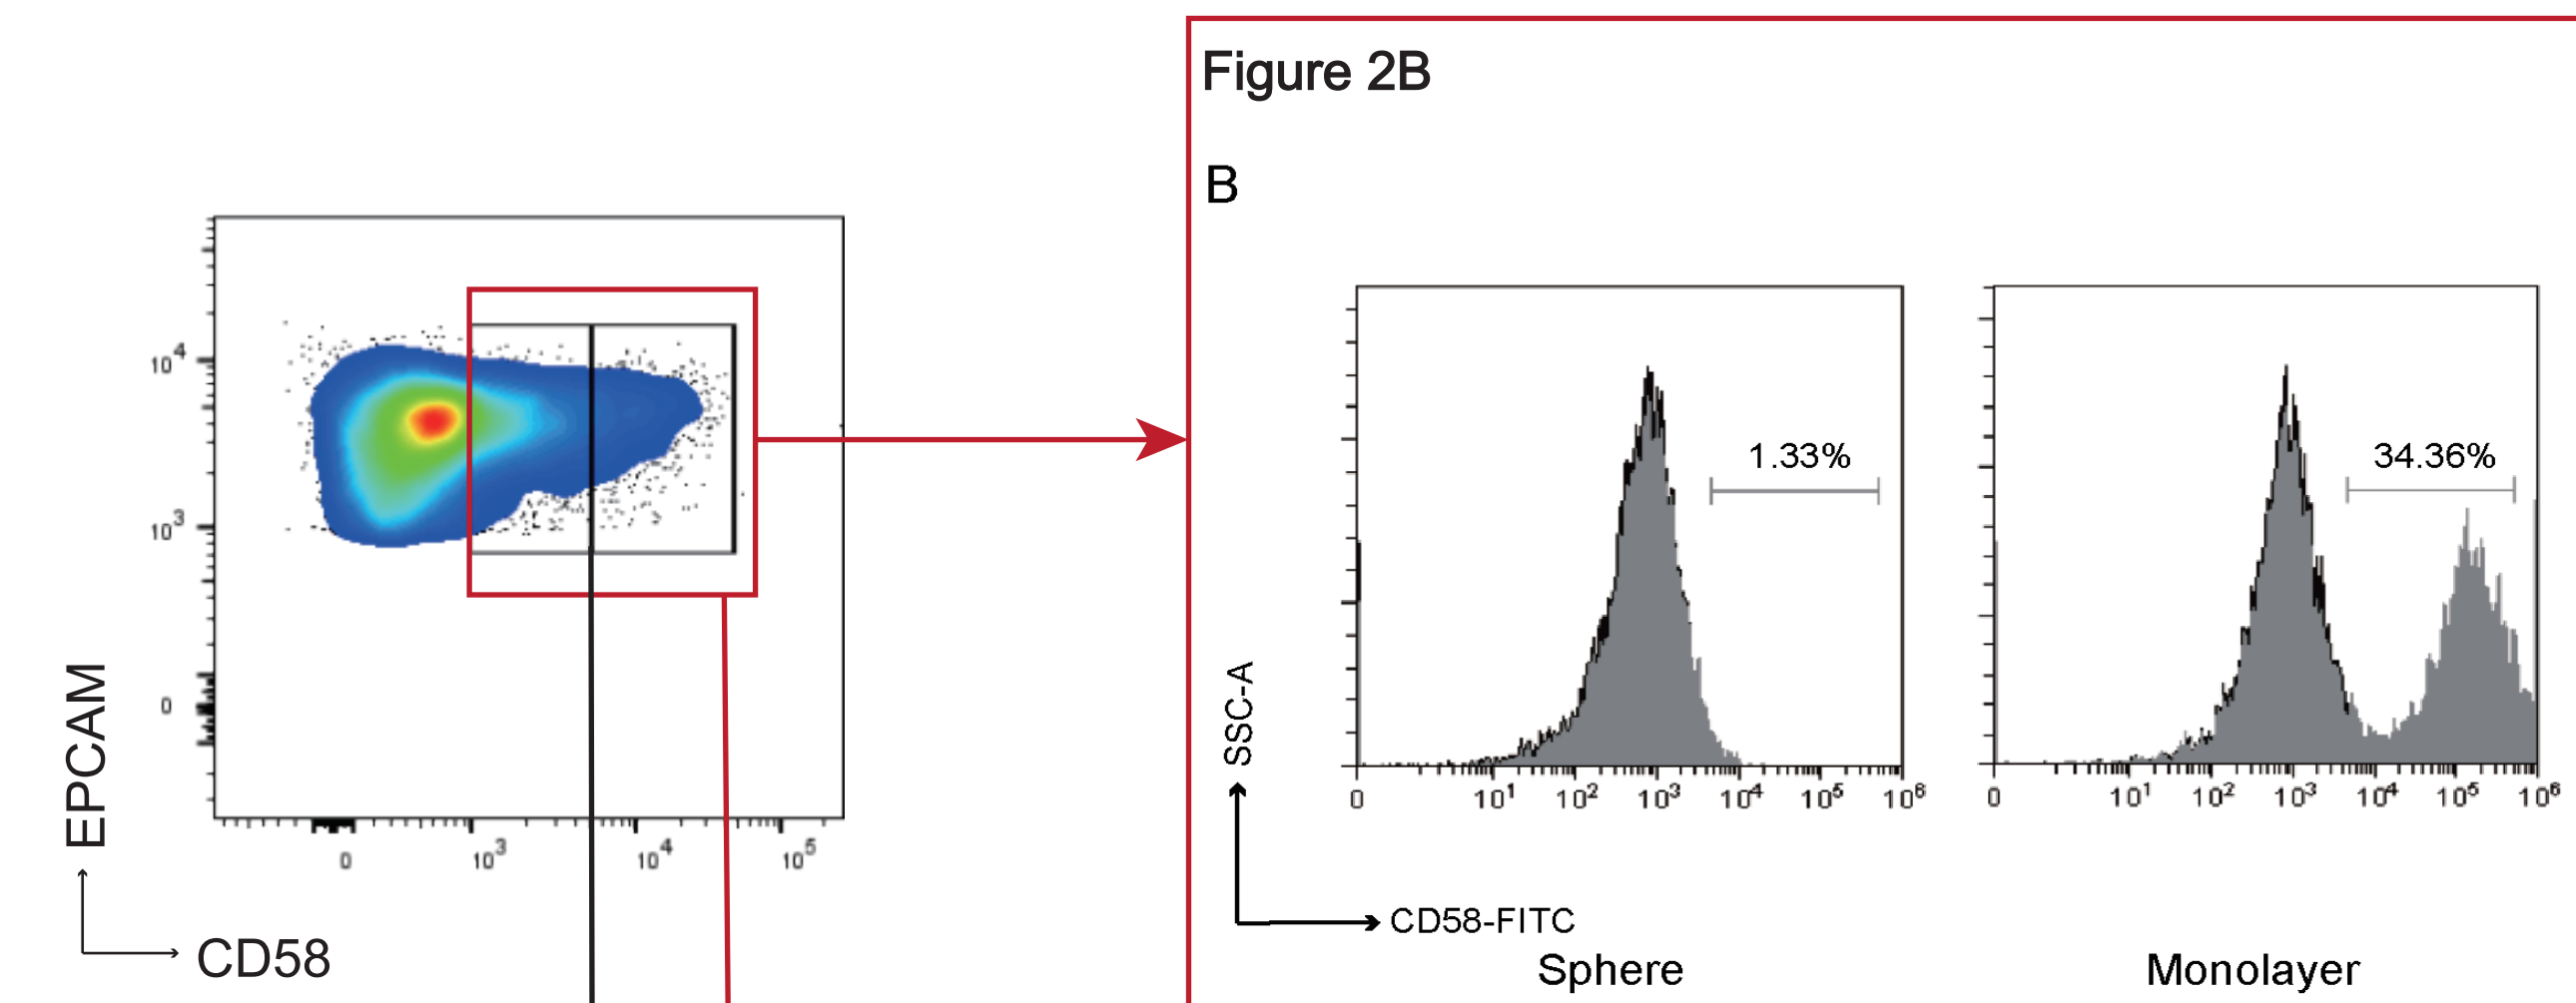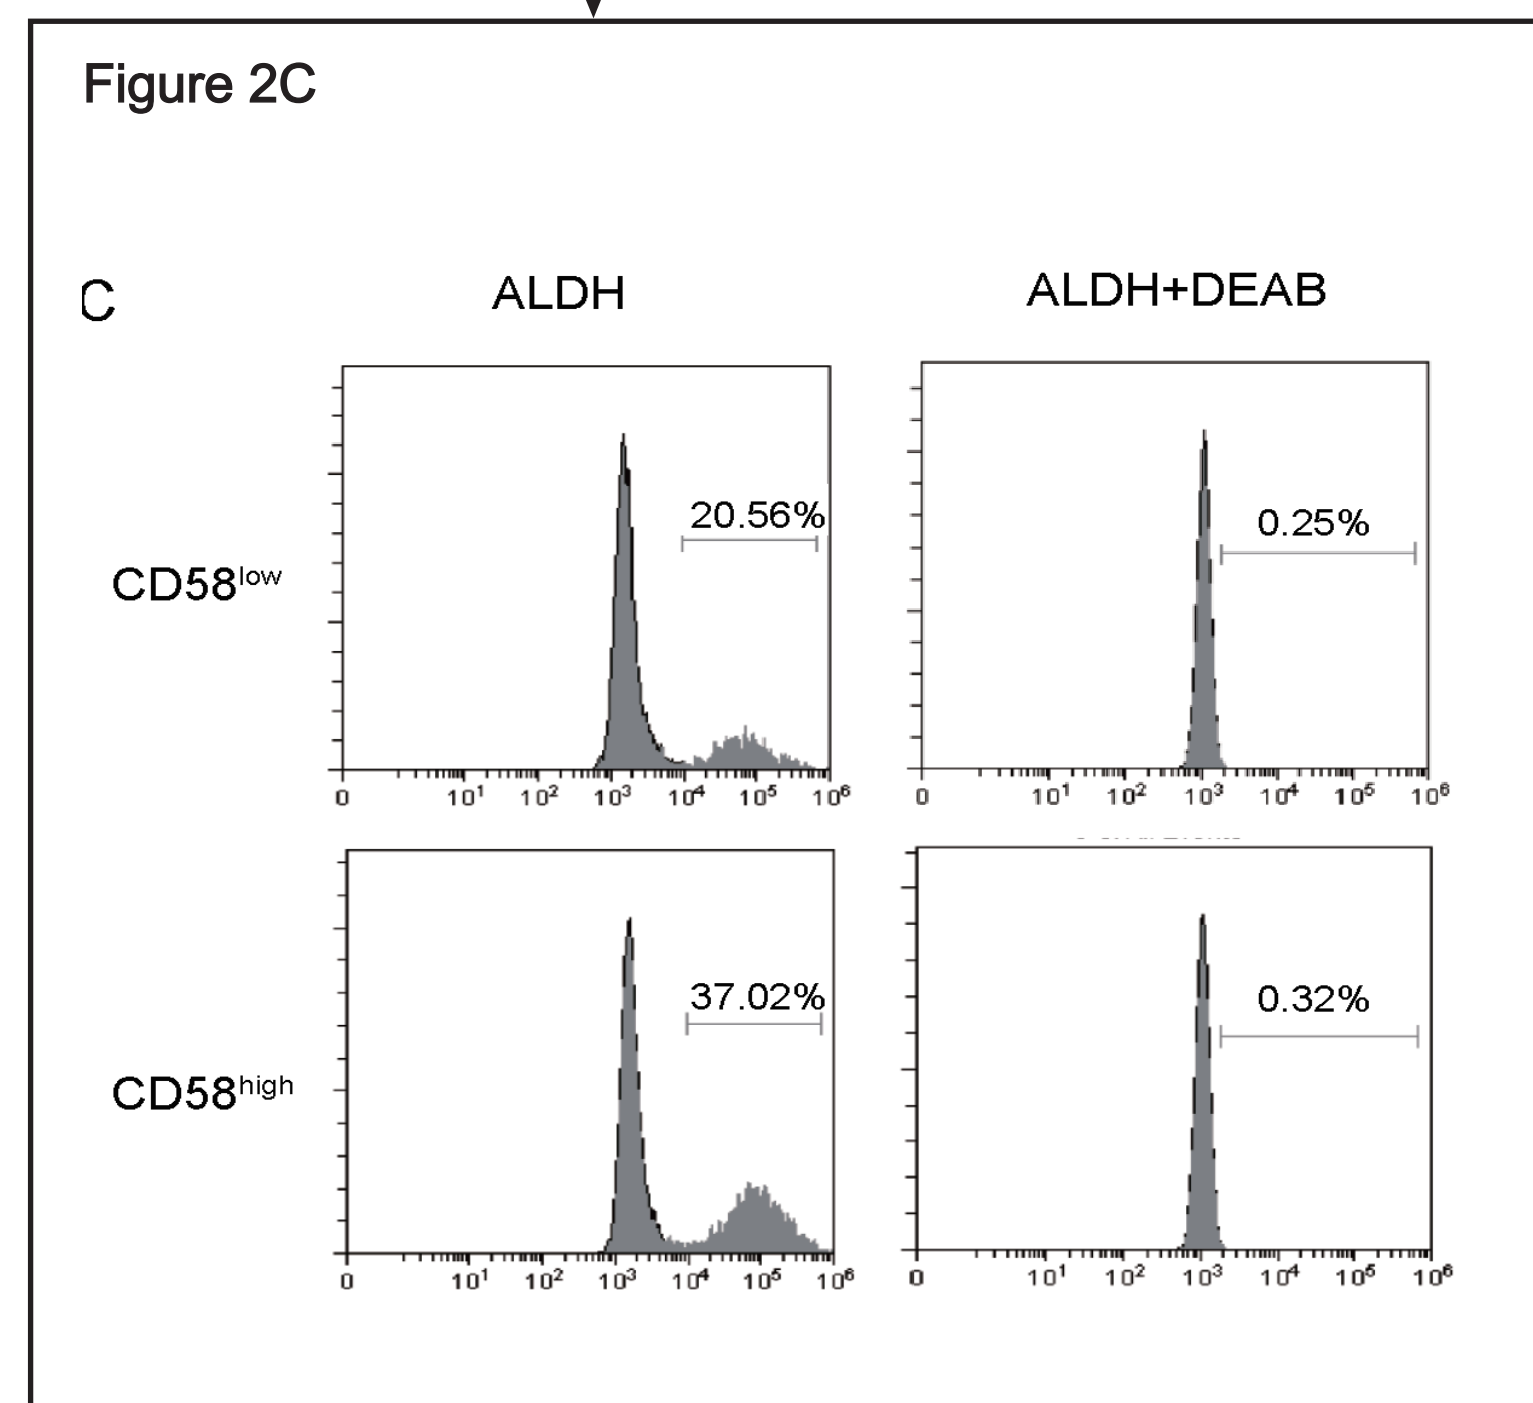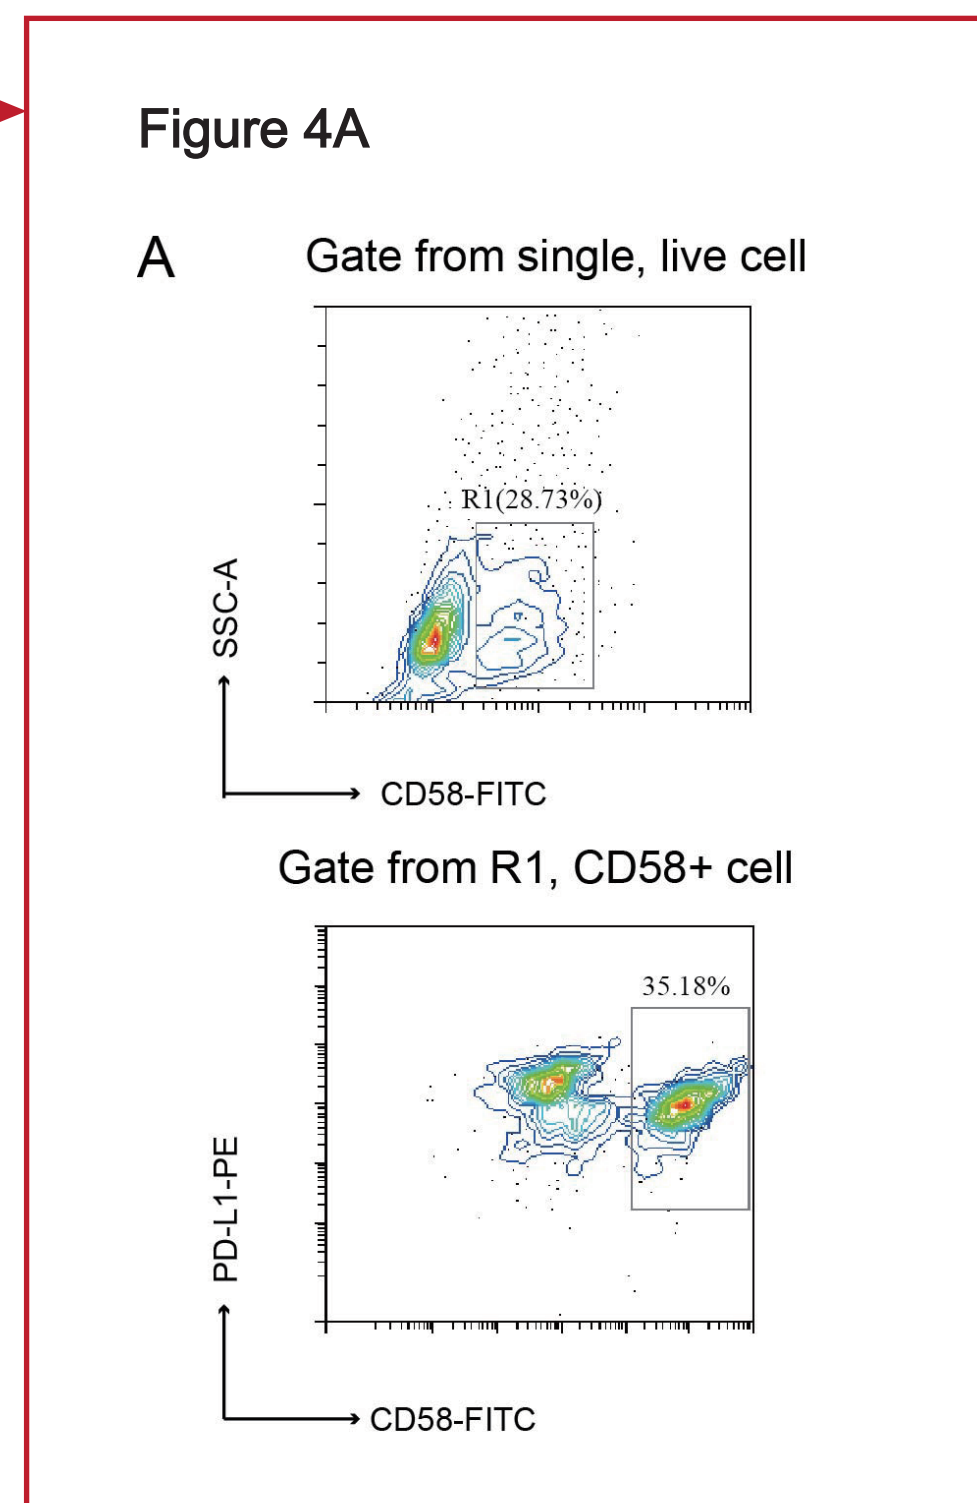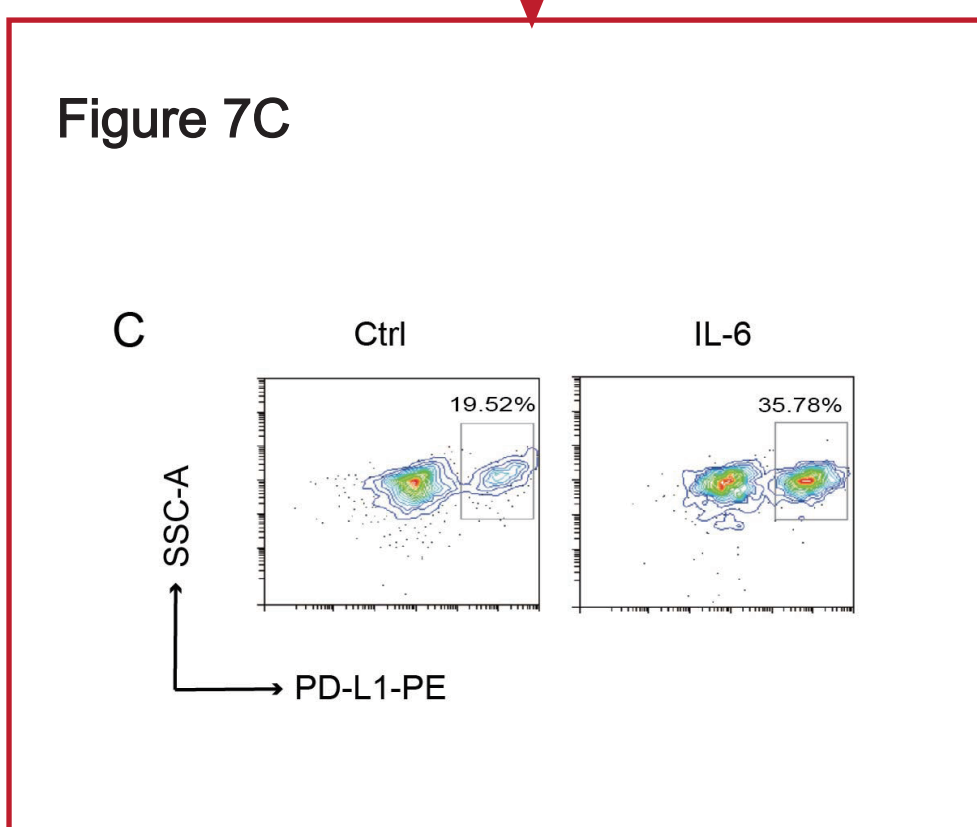

## Flow cytometry (FACS) plots 2

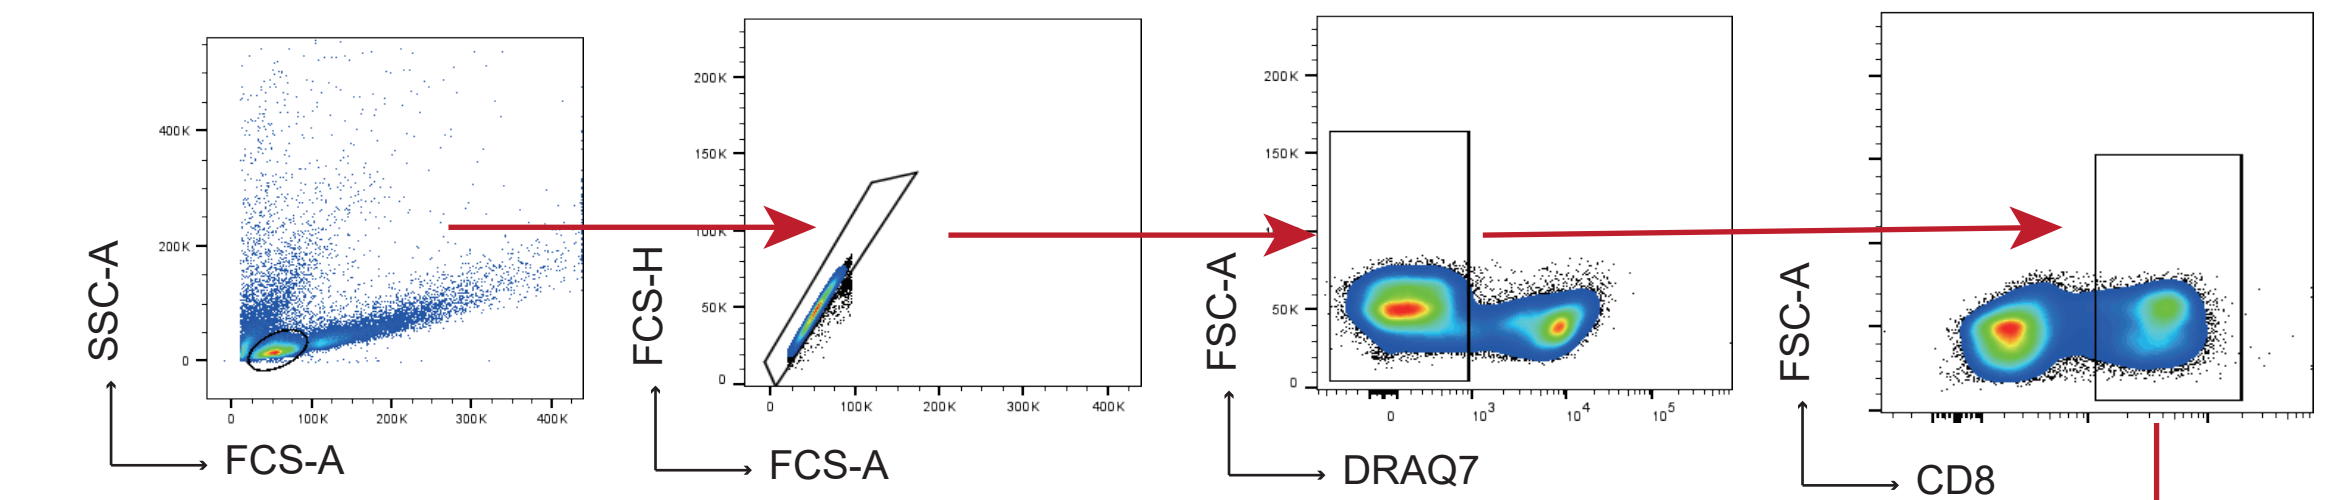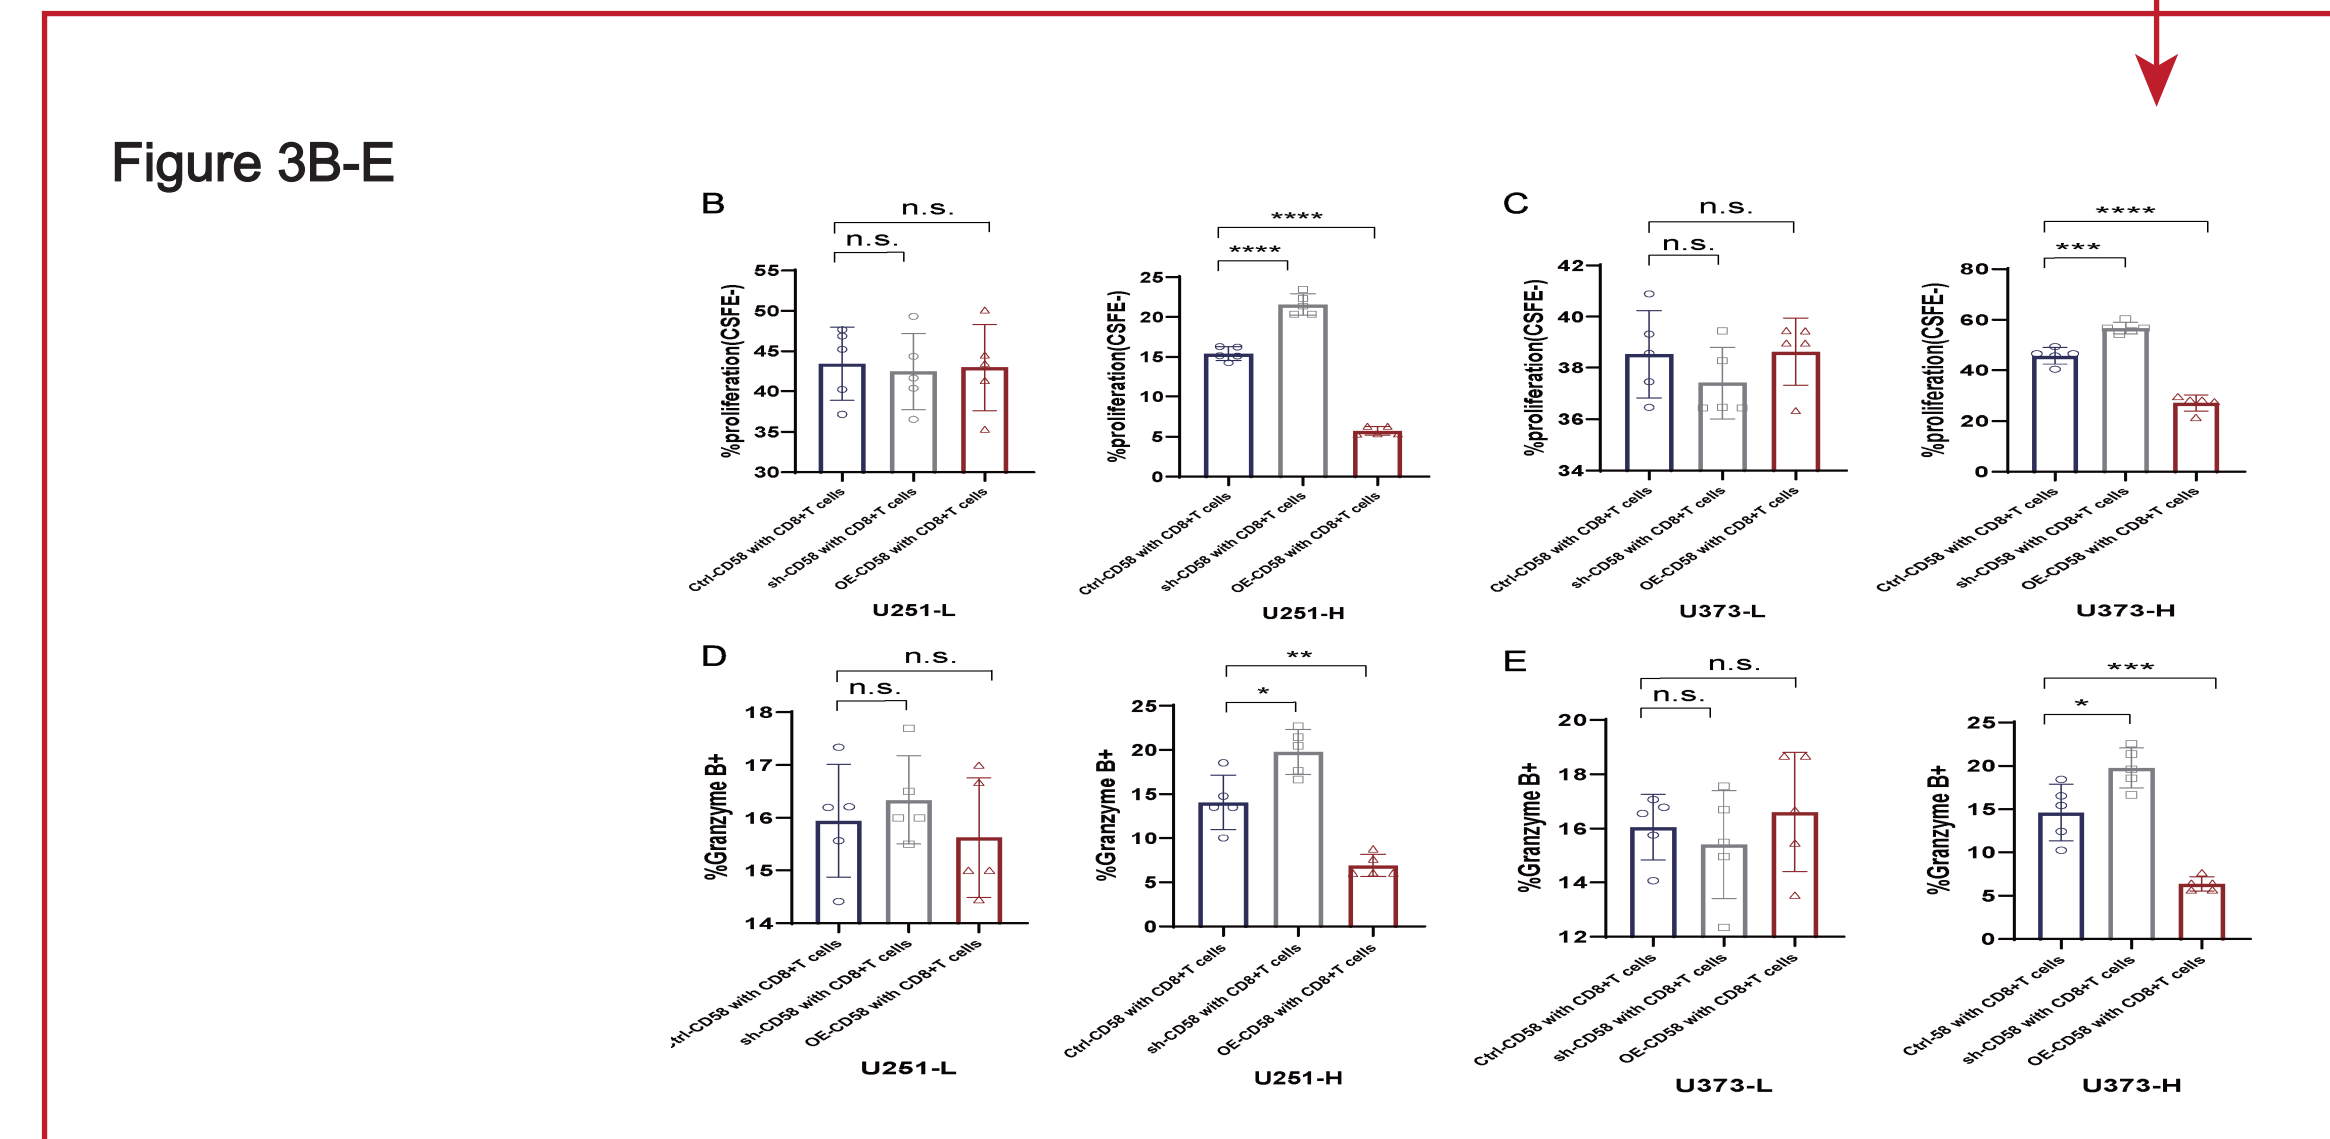

## Flow cytometry (FACS) plots 3

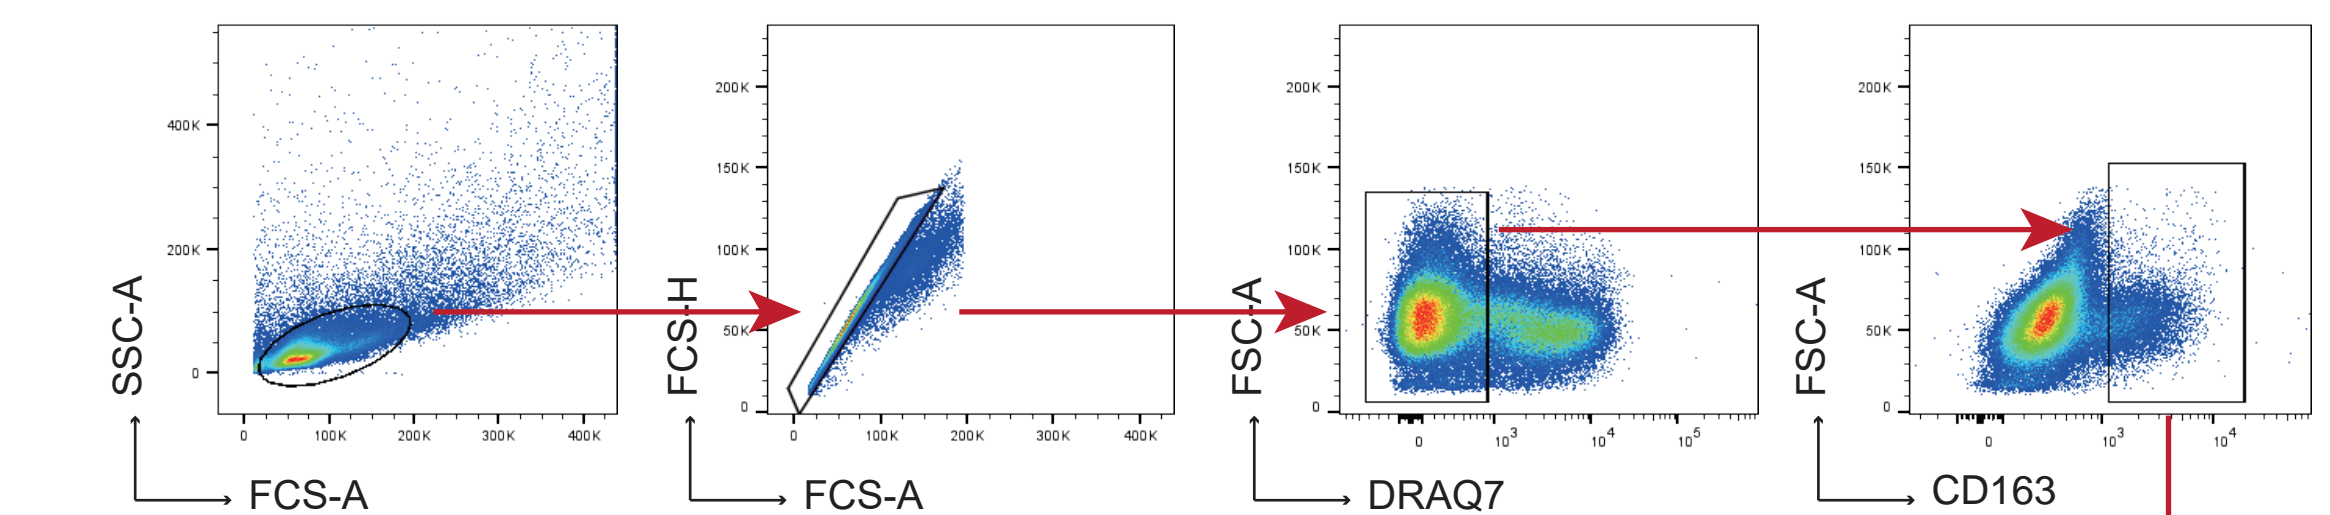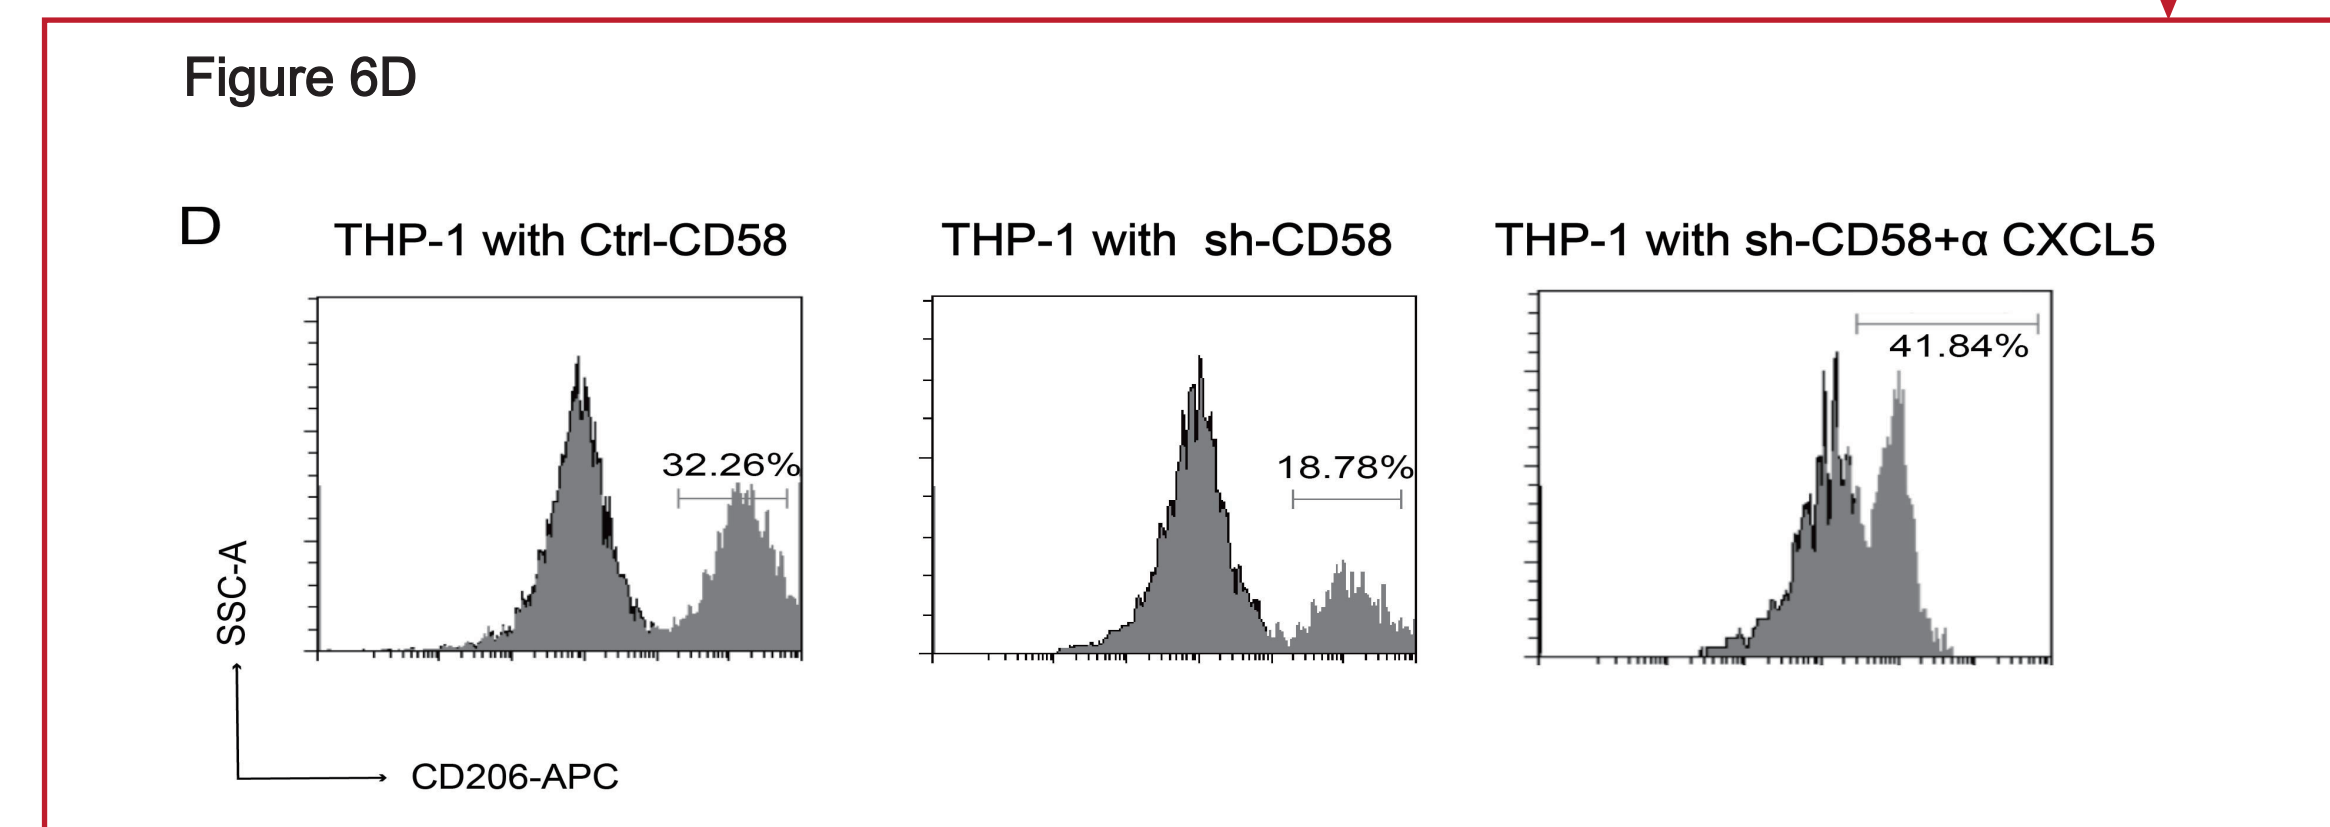

Supplement: 42003_2024_6712_MOESM7_ESM.pdf [file 42003_2024_6712_MOESM7_ESM.pdf]
