# Supplementary material for: CD58 defines regulatory macrophages within the tumor microenvironment
Source: PubMed Central journal article supplement — Commun Biol. 2024 Aug 21;7:1025. doi: 10.1038/s42003-024-06712-6 (PMC11335740; doi:10.1038/s42003-024-06712-6), 2024-08-21
Supplement: 42003_2024_6712_MOESM9_ESM.pdf [file 42003_2024_6712_MOESM9_ESM.pdf]

# CD58 defines regulatory macrophages within the tumor microenvironment

Corresponding Author: Dr Meixi Jiang

Version 0:

Reviewer comments:

Reviewer #1

(Remarks to the Author)

This manuscript by Wu et al. describes the crosstalk between CD58 and tumor-associated macrophages. Using TCGA and GEO datasets, the authors perform survival analysis and univariate Cox regression analysis to reveal the potential role of CD58 in clinicopathological features of glioma patients. They also gave evidence of the possible role of CD58 on tumor stemness and macrophages recruiting. In addition, IL-6 secreted by macrophages could upregulate PD-L1 expression in CD58high gliomas, possibly mediated by STAT3 and NF- $\kappa$ B signaling pathways.

CD58 is known to play an important role in promoting cell adhesion and recognition, also in inducing activation and proliferation of T/NK cells. Besides, CD58 has been found to be related to tumor metastasis. As for its relation with tumor stemness, Xu et al. has reported CD58 as a promoter of tumor initiating cells in colorectal cancer in 2015(doi: 10.1038/onc.2014.95).

It seems that CD58 does play a role in glioma stemness, but the magnitude or degree of its prognostic value may be more complicated than it has been described in the manuscript, at least CD58 alone may not establish a precise predictive system. If the authors could provide more clinical proof and more insights into why CD58 specifically is the key and show that why other proteins are less important in this context, it would substantially raise the impact of this work.

In the introduction section, the elicitation of CD58 is rather rigid. It would be better if more context could be dedicated at this part to make the analysis of the possible link between CD58 and macrophages more logical.

In Fig 1C, when comparing the OS and DSS of pan cancer patients, how was the sample size of both groups decided? Why the subjects of CD58 high group and CD58 low group varies significantly?

In Fig 2E, it is assumed that the authors use two representative illustrations to convey the idea that mice inoculated with CD58high or CD58low tumor cells showed different tumorigenicity rate, however, to interpret this argument in a more complete and quantified way, more results are needed, such as at least three representative illustrations of each group taken at the same time, the average radiance of each mouse at different time points after tumor inoculation ( e.g. day7, 14, 21), pathological sections of the mice brains, percent survival, etc.

At their attempts to elucidate the potential pathways responsible for CD58 regulation, the authors selectively block Hedgehog, Hippo, Wnt and Notch pathways, which are all classic targets of anti-cancer stem cell therapies. However, although the authors claim that YAP1 inhibitor decursin could downregulate CD58 expression, Fig 2F depict CD58 decrease in Wnt inhibitor group, please recheck.

In the third part of the results, the authors found upregulated CXCL5 and CXCL2, also demonstrate the possible relation of CD58 and macrophages. However, how the conclusion that CD58 regulates macrophages through above two chemokines was drawn is still vague.

In the fifth part of the results, cell supernatant from CD58high glioma cells was added to PBMCs and CD8+ T cells to reveal their immunosuppressive features. More evidence are needed to better describe the characteristics of the impaired T cells, such as the activation, memory and exhaustion phenotypes, the degranulation ability and cytotoxicity potential, etc. In addition, the effects of CD58high glioma cells on CD4+ T cells may also be of interest.

In the last part of the results, the authors use sh-CD58 as an intervention in CD58high glioma xenograft models and observed decreased tumor volume. However, will the results be opposite in CD58low glioma xenograft models? And current

results are not sufficient to claim the role of CD58 in remodeling the immune microenvironment, more details of the specific cellular composition will depict a more thorough picture of the microenvironment of mice from different groups, e.g. CyTOF is recommended at this part.

In this manuscript, the authors define CD58 as a mediator of glioma stemness and immunosuppression. However, some other researchers have found elevated CD58 expression associate with complete clinical response and survival in B cell malignancies. Are these findings conflict with conclusions of this manuscript?

Finally, the language of this manuscript needs careful review by someone with expertise in English editing or whose native language is English, with particular attention paid to grammatical mistakes and sentence structure. For example, the sentence "CD58 was associated with NANOG, SOX2 and POU5F1 related stem cell associated gene expression was significantly higher in spheroids than in adherent monolayers"(line 116-117) appears to be quite confusing to read, and the sentence "To identify the potential mechanisms by which CD58 regulates gliomas" is not complete.

Reviewer #2

(Remarks to the Author)

In this manuscript, Bo Wu et al demonstrated that CD58 may contribute to the tumor cell stemness and recruit macrophages in glioma. However, this article has the following shortcomings:

1. What about other immune cell infiltration in CD58high gliomas?
2. How could CD58 regulate the stem cell genes need to illustrate.

This article also has the following minor shortcomings:

1. All the methods used in this paper should be indicated in detail, including the database, cell and spheroid culturing and treatment, animal model, statistics and so on.
2. Results need to be explained in detail and more clearly.
3. In Fig 5A, author need to compare the difference between normal and glioma tissue.
4. What's the meaning of "ALDH+DEAB" and "DEAB"? Why ALDH activity increase after DEAB treatment?
5. Discussion is too simple. It needs to clarify in detail and logically.

Author Rebuttal letter:

Reviewer respond:

1. Mechanistic explorations need to be strengthened on how high expression of CD58 contributes to the stemness status of glioma cells, recruitments of macrophages via chemokines, and PD-L1 expression.

Answer: In this study, we demonstrated that elevated CD58high glioma was closely correlated with stemness properties of patients with glioma. We also found that CD58high glioma activated CXCL5 secretion. This process further induces the recruitment and M2 polarization of macrophages, which induced immune escape. The M2 polarized macrophages and IL-6 production was induced by CXCL5. Moreover, we found that PD-L1 expression was up-regulated in glioma and associated with IL-6-STAT3 signaling pathways activation. Our results suggest that CD58high glioma induce macrophages polarization through CXCL5 secretion, macrophages also regulated the expression of PD-L1 in CD58high glioma via IL-6 production.

To gain insights into these distinct populations of glioma, CD58 and several stemness-related genes (NANOG, SOX2, POU5F1, ALDH), in particular SOX2, ALDH, remarkably increased in spheres in comparison with adjacent monolayer cells. According to our findings, just YAP1 inhibitors were able to partly down-regulate CD58high, suggesting potential involvement of Hippo-YAP pathways in regulating CD58 level within glioma. When equal numbers of cells ( $1 \times 10^6$ ) were inoculated into BLAB/C mice, the CD58high cells displayed accelerated tumor formation compared to CD58low cells. We also performed survival analysis to estimate the frequency of tumor-initiating cells in the CD58high and CD58low cells populations. Thus, CD58high cells represent glioma with tumorigenic potential.

To ascertain the role of CD58 in regulating macrophages, the cancer cell from the glioma cell culture and glioma co-culture with THP-1 were examined. Cytokines with significant up-regulation included CXCL5. For addressing if CXCL5 is related to CD58high mediated macrophage polarization, the CXCL5 inhibitor and recombinant proteins were added to the glioma (OE-CD58 and sh-CD58) and macrophage co-culture assays. The polarization of macrophage was induced by the glioma

(OE-CD58) and CXCL5 inhibitor. To further explore the role of CXCL5 in glioma-mediated macrophage migration, a CXCL5 inhibitor and recombinant proteins were individually added to the glioma (OE-CD58 and sh-CD58) and macrophage co-culture assays, the migration of macrophage was induced by the glioma (OE-CD58) and CXCL5 inhibitor. Collectively, these findings suggest that CD58<sup>high</sup> contributes to the polarization and migration of macrophage through CXCL5 secretion.

To investigate the effect of CD58 on modulating TME, we examined PD-L1 level in glioma using flow cytometry. Additionally, microscopy imaging was performed to elucidate the crosstalk mechanism between CD58 and PD-L1. Our findings indicate that the treatment of glioma cells with OE-CD58 and sh-CD58 regulated PD-L1 level; the induction of PD-L1 expression showed a CD58-dependent manner. These results suggest the potential of CD58 as an effective means of cancer immunotherapy. The present work then investigated whether IL-6 signaling could affect PD-L1 level within CD58<sup>high</sup> glioma. PD-L1 expression of CD58<sup>high</sup> glioma increased after treatment with IL-6 recombinant protein. Additionally, TCGA-derived clinical samples displayed a positive correlation between IL-6 and PD-L1 expression, which supports the *in vitro* results. Therefore, IL-6 signaling stimulates PD-L1 level. According to our results, inhibition of STAT3, but not of NF- $\kappa$ B, abrogated IL-6-induced expression of PD-L1, suggesting that IL-6 increases PD-L1 expression by activating STAT3 signaling.

2. More evidence is necessary to support the prognostic value of CD58 in cancer patients.

Answer: In this part we read your comments in detail and made changes. By carefully reading the literature, we provide a more detailed clinical proof as the potential therapeutic targets. Additionally, CD58 expression elevated in glioma tissues in comparison with that in the adjacent tissues ( $n = 4$ ) ( $P < 0.05$ ). CD58 expression was assessed in glioma tissues ( $n = 42$ ) and in comparison with patients' OS ( $P = 0.011$ ). As verified by the aforementioned results, CD58 expression is markedly associated with clinicopathologic features of glioma patients. These findings revealed that CD58 is an oncogenic gene in glioma.

Reviewer #1 (Remarks to the Author):

This manuscript by Wu et al. describes the crosstalk between CD58 and tumor-associated macrophages. Using TCGA and GEO datasets, the authors perform survival analysis and univariate Cox regression analysis to reveal the potential role of CD58 in clinicopathological features of glioma patients. They also gave evidence of the possible role of CD58 on tumor stemness and macrophages recruiting. In addition, IL-6 secreted by macrophages could upregulate PD-L1 expression in CD58<sup>high</sup> gliomas, possibly mediated by STAT3 and NF- $\kappa$ B signaling pathways.

CD58 is known to play an important role in promoting cell adhesion and recognition, also in inducing activation and proliferation of T/NK cells. Besides, CD58 has been found to be related to tumor metastasis. As for its relation with tumor stemness, Xu et al. has reported CD58 as a promoter of tumor initiating cells in colorectal cancer in 2015 (doi: 10.1038/onc.2014.95).

Question 1: It seems that CD58 does play a role in glioma stemness, but the magnitude or degree of its prognostic value may be more complicated than it has been described in the manuscript, at least CD58 alone may not establish a precise predictive system. If the authors could provide more clinical proof and more insights into why CD58 specifically is the key and show that why other proteins are less important in this context, it would substantially raise the impact of this work.

Answer: Thank you for your comments on the part of the article. In this part we read your comments in detail and made changes. By carefully reading the literature, we provide a more detailed clinical proof as the potential therapeutic targets (Lines 221-227). Additionally, CD58 expression elevated in glioma tissues in comparison with that in the adjacent tissues ( $n = 4$ ) ( $P < 0.05$ ) (Fig. 1E). CD58 expression was assessed in glioma tissues ( $n = 42$ ) and in comparison with patients' OS ( $P = 0.011$ )

(Fig. 1F, G). These findings revealed CD58 to be an oncogenic gene in glioma. As verified by the aforementioned results, CD58 expression is markedly associated with clinicopathologic features of glioma patients. These findings revealed that CD58 is an oncogenic gene in glioma.

Question 2: In the introduction section, the elicitation of CD58 is rather rigid. It would be better if more context could be dedicated at this part to make the analysis of the possible link between CD58 and macrophages more logical.

Answer: Thank you very much for your questions about the manuscript. We have considered this section carefully and believe that you are right. Therefore, we add the relevant content in the introduction section.

Lines 33-79:

Immune checkpoint blockades-based immunotherapy represents the candidate treatment for advanced solid and liquid tumor patients [1]. Immune structure, with the feature of typical infiltrating immune cell components, density and functional status in tumor microenvironment (TME), significantly influences clinical outcomes [2, 3]. TME-targeting immunotherapy has emerged as the cancer treatment. But because of the considerable TME heterogeneity, monoclonal anti-programmed cell death protein 1 (PD-1) antibody is associated with a poor response rate [4]. Therefore, identifying new immunoregulatory factors for enhancing anti-tumor response is crucial.

Macrophages account for innate immune cells with the highest abundance within TME, which demonstrate potent tumor promoting and immunosuppressive activities in numerous cancers and are important for establishing efficient anticancer immunity [5].

In line with environmental cues, tumor-associated macrophages demonstrate various activation statuses to exert typical effects, which are simply categorized into classically activated (M1; usually under the activation by IFN- $\gamma$  and TLR ligands, with up-regulation of IL-12, IL-23, TNF- $\alpha$ , MHC-II, IL-6, and iNOS) or alternatively activated (M2; usually under the activation by IL-4 and IL-13, with up-regulation of IL-10 and TGF- $\beta$ ) [6]. Macrophages, in particular M1-polarized ones, are capable of capturing and eliminating those transformed cancer cells through phagocytosis and presenting tumor-derived antigens to prime T cells, activating the downstream adaptive immunity [7]. M1-polarized macrophages demonstrate the enhanced phagocytosis activity, are also related to the enhanced prognostic outcome of patients with gastric cancer [8]. Nonetheless, cancer cells are recently suggested to increase anti-phagocytic marker expression, evading macrophage phagocytosis [9]. Therefore, a comprehensive exploration of the significance of macrophages in cancer is essential. CD58, called LFA-3 as well, is an immune adhesion molecule and a surface glycoprotein with a high glycosylation level (40~70 kDa), besides, its expression can be widely detected in nonhematopoietic and hematopoietic cells [10, 11]. CD58 expressed on cell surface enhances the effector-target adhesion in the case of antigen-specific recognition [12]. It also provides an efficient second signal to activate T cells, as a result, it can optimize and replenish the TCR/CD3 pathway-regulated proliferative response [13, 14]. CD58 has an important role in leucocyte-regulated chemotaxis, cytotoxicity, phagocytosis, as well as lymphocyte proliferation and differentiation induction. CD58 expression is regulated by cytokines in a cell-dependent manner. Its expression is not responsive to the stimulation of cytokines like IL-1, IL-6, TNF- $\alpha$ , and IFN- $\gamma$  in breast cancer, healthy hepatocytic and colonic epithelial cells [15~17]. CD58 expression remained unchanged after bronchial epithelial cells are stimulated by TNF- $\alpha$  and IFN- $\gamma$  [18]. CD58 is the risk factor, and there is no definite report regarding its relation with tumor-associated macrophages. This study demonstrated CD58's potential as the independent prognostic factor for glioma patients and its ability in patient identification. CD58<sup>high</sup> glioma induces macrophage polarization through CXCL5 secretion, where M2 macrophages regulate PD-L1 expression within CD58<sup>high</sup> glioma via IL-6 production. Moreover, according to our results, PD-L1 expression elevated within glioma and was related to IL-6/STAT3 signaling pathways activity. Such observations provide more information regarding the effect of CD58 on cancer and offer the potential predictive system for evaluating prognosis of cancer patients.

Question 3: In Fig 1C, when comparing the OS and DSS of pan cancer patients, how was the sample size of both groups decided? Why the subjects of CD58<sup>high</sup> group and CD58<sup>low</sup> group varies significantly?

Answer: Thank you very much for reading our article so carefully and giving comments on some details of the article, and we have made corrections due to relevant fuzzy description results, and we would like to thank you in particular for your questions. Firstly, the expression of CD58 in pan-cancer was extracted from TCGA database, and the median CD58 expression was used to distinguish the high expression group and the low expression group. Next, We performed univariate analysis using information from pan-cancer entries in TCGA datasets.

Lines 215-218

To be specific, patients showing high CD58 expression displayed the decreased overall survival (OS) and disease-specific survival (DSS) compared with those exhibiting low CD58 expression in LGG (low-grade glioma), GBM, HCC (hepatocellular carcinoma), and PAAD cohorts (Fig. 1C).

Question 4: In Fig 2E, it is assumed that the authors use two representative illustrations to convey the idea that mice inoculated with CD58<sup>high</sup> or CD58<sup>low</sup> tumor cells showed different tumorigenicity rate, however, to interpret this argument in a more complete and quantified way, more results are needed, such as at least three representative illustrations of each group taken at the same time, the average radiance of each mouse at different time points after tumor inoculation ( e.g. day7, 14, 21), pathological sections of the mice brains, percent survival, etc.

Answer: Thank you for your comments on the part of the article. In this part we read your comments in detail and made changes. We provided each mouse at different time points after tumor inoculation (day 7, 14, 21), pathological sections of the mice brains, percent survival to convey the idea that mice inoculated with CD58<sup>high</sup> or CD58<sup>low</sup> tumor cells showed different tumorigenicity rate

By carefully reading the literature, we provide a more visual proof of this statement in lines 246-249. When equal numbers of cells ( $1 \times 10^6$ ) were inoculated into BLAB/C mice, the CD58<sup>high</sup> cells displayed accelerated tumor formation compared to CD58<sup>low</sup> cells (Fig. 2F, G). We also performed survival analysis to estimate the frequency of tumor-initiating cells in the CD58<sup>high</sup> and CD58<sup>low</sup> cells populations (Fig. 2H). Due to the limited space, we have mentioned the size of glioma at each time point(day 7, 14, 21), pathological section results and survival time, and do not provide three pictures of each time point, but if necessary, we can provide all the original data to prove the effect of CD58 on glioma tumorigenesis

Question 5: At their attempts to elucidate the potential pathways responsible for CD58 regulation, the authors selectively block Hedgehog, Hippo, Wnt and Notch pathways, which are all classic targets of anti-cancer stem cell therapies. However, although the authors claim that YAP1 inhibitor decursin could downregulate CD58 expression, Fig 2F depict CD58 decrease in Wnt inhibitor group, please recheck.

Answer: Thank you very much for reading our article so carefully and giving comments on some details of the article, and we have made corrections (Fig 2F) due to relevant false results, and we would like to thank you in particular for your questions.

Question 6: In the third part of the results, the authors found upregulated CXCL5 and CXCL2, also demonstrate the possible relation of CD58 and macrophages. However, how the conclusion that CD58 regulates macrophages through above two chemokines was drawn is still vague.

Answer: Thank you for your comments on the part of the article. In this part we read your comments in detail and made changes. Firstly, we identified the association between CD58 and macrophages by bioinformatics analysis in lines 274-283. GSEA analysis revealed that when compared with CD58<sup>low</sup> glioma, cytokine-cytokine receptor interaction evidently increased in CD58<sup>high</sup> glioma (Fig. 5A). Besides, according to CIBERSORT algorithm analysis, immune cell infiltration was significantly different in CD58<sup>high</sup> relative to CD58<sup>low</sup> glioma. M2 macrophage infiltration degrees of CD58<sup>high</sup> glioma remarkably elevated in comparison with CD58<sup>low</sup> glioma ( $P = 0.002$  and  $P < 0.001$ , separately; Fig. 5B). This study later

examined and categorized 62810 single-cell transcriptomes through GSE140819. CD58 exhibited an apparently enriched signature gene associated with macrophage polarization (Fig. 5C). Confocal imaging showed M2 macrophage infiltration positive location tumor compare to adjacent (Fig. 5D).

To understand how CD58 regulated macrophage, the cancer cell from the glioma cell culture and glioma co-culture with THP-1 were analyzed in lines 286-294.

To ascertain the role of CD58 in regulating macrophages, the cancer cell from the glioma cell culture and glioma co-culture with THP-1 were examined. Cytokines with significant up-regulation included CXCL5 (Fig. 6A). For identifying the CXCL5 source, we conducted RT-PCR for detecting the CXCL5 expression in glioma and macrophage based on the co-cultured system respectively and in non-co-cultured glioma and macrophage. CXCL5 expression within glioma cells acquired based on the co-cultured system increased compared to other groups (Fig. 6B). Consistently, CXCL5 was mainly derived from CD58<sup>high</sup> in TME, according to immunofluorescence localization results (Fig. 6C).

To clarify the effect of CXCL5 on macrophages, a CXCL5 inhibitor and recombinant proteins was added to the glioma (OE-CD58 and sh-CD58) and macrophage co-culture assay (Lines 297-306).

For addressing if CXCL5 is related to CD58<sup>high</sup> mediated macrophage polarization, the CXCL5 inhibitor and recombinant proteins were added to the glioma (OE-CD58 and sh-CD58) and macrophage co-culture assays. The polarization of macrophage was induced by the glioma (OE-CD58) and CXCL5 inhibitor (Fig. 6D). To further explore the role of CXCL5 in glioma-mediated macrophage migration, a CXCL5 inhibitor and recombinant proteins were individually added to the glioma (OE-CD58 and sh-CD58) and macrophage co-culture assays, the migration of macrophage was induced by the glioma (OE-CD58) and CXCL5 inhibitor (Fig. 6E). Collectively, these findings suggest that CD58<sup>high</sup> contributes to the polarization and migration of macrophage through CXCL5 secretion. Therefore, these data suggest that CD58<sup>high</sup> contributed the polarization and migration of macrophage in the manner of CXCL5 secretion.

In this part, we modify the previous statement and suggest that CD58 mainly regulates CXCL5 expression and that CXCL5 expression is the most meaningful. Secondly, flow cytometry and Transwell assay were used to demonstrate that CD58 promoted the polarization and migration of macrophages through CXCL5, and the role of CXCL5 in macrophages was clarified.

Question 7: In the fifth part of the results, cell supernatant from CD58<sup>high</sup> glioma cells was added to PBMCs and CD8<sup>+</sup> T cells to reveal their immunosuppressive features. More evidence are needed to better describe the characteristics of the impaired T cells, such as the activation, memory and exhaustion phenotypes, the degranulation ability and cytotoxicity potential, etc. In addition, the effects of CD58<sup>high</sup> glioma cells on CD4<sup>+</sup> T cells may also be of interest.

Answer: First of all, thank you very much for reading our article so carefully and giving comments of the article, in this part we read your comments in detail and make changes in lines 255-271:

For validating immune distribution of CD58, a CIBERSORT analysis on glioma was carried out. The results revealed that CD58 significantly reduced CD8<sup>+</sup> T cell infiltration into glioma tumors (Fig. 3A). Furthermore, CD3<sup>+</sup>T cells were cultured within conditioned medium of human GBM cells before collection after 4 days to conduct flow cytometry. To assess immunosuppressive nature of glioma, CD8<sup>+</sup> T cells were cultured with sh-CD58 or OE-CD58 glioma cells. In the present functional test, CD8<sup>+</sup> T cell proliferation was significantly impaired when co-cultured with OE-CD58 glioma cells (Fig. 3B-E). Thus, CD58 reprogrammed glioma cells into immunosuppressive states.

To investigate the effect of CD58 on modulating TME, we examined PD-L1 level in glioma using flow cytometry (Fig. 4A). Additionally, microscopy imaging was performed to elucidate the crosstalk mechanism between CD58 and PD-L1 (Fig. 4B). Our findings indicate that the treatment of glioma cells with OE-CD58 and sh-CD58 regulated PD-L1 level; the induction of PD-L1 expression showed a CD58-dependent manner (Fig. 4C, D). These results suggest the potential of CD58 as an effective means of cancer immunotherapy.

In this part, we used flow cytometry to determine the effect of CD58<sup>high</sup> glioma on CD8<sup>+</sup> T cells, but due to the limited time, we only used CSFE and GzmB to determine the effect of CD58<sup>high</sup> glioma on CD8<sup>+</sup>T cell immunosuppression, but we believe that this does not affect the conclusion. Our main point was to demonstrate the interaction of CD58<sup>high</sup> glioma with macrophages, which produce inflammatory factors that

stimulate CD58<sup>high</sup> glioma PD-L1 expression and further inhibit T cell function.

Question 8: In the last part of the results, the authors use sh-CD58 as an intervention in CD58<sup>high</sup> glioma xenograft models and observed decreased tumor volume. However, will the results be opposite in CD58<sup>low</sup> glioma xenograft models? And current results are not sufficient to claim the role of CD58 in remodeling the immune microenvironment, more details of the specific cellular composition will depict a more thorough picture of the microenvironment of mice from different groups, e.g. CyTOF is recommended at this part.

Answer: Thank you for your comments on the part of the article. In this part we read your comments in detail and made changes. By carefully reading the literature, we provide a more results of this statement in lines 325-331.

For better evaluating if CD58 treatment could abrogate TME, tumor samples were collected and it was found that combination treatment with CD58 significantly induced the volume of tumors in the xenograft specimens (Fig. 7E). CD58, CXCL5, and PD-L1 levels in human specimens were analyzed using immunohistochemical staining (Fig. 7F). Collectively, these findings suggest that CD58 holds promise as the efficient treatment for suppressing tumor development.

In order to clarify the effect of CD58 on the tumor microenvironment in glioma, and also to clarify the spatial location of CD58 with PD-L1 and CXCL5, we confirmed that the expression of CD58 was positively correlated with the expression of PD-L1 and CXCL5 by multiple staining.

Question 9: In this manuscript, the authors define CD58 as a mediator of glioma stemness and immunosuppression. However, some other researchers have found elevated CD58 expression associate with complete clinical response and survival in B cell malignancies. Are these findings conflict with conclusions of this manuscript?

Answer: First of all, thank you very much for reading our article so carefully and giving comments on some details of the article.

CD58 is a novel cell-surface marker that functionally regulates self-renewal of CT-ICs, which may provide an intriguing therapeutic target for the efficient killing and elimination of CT-ICs (Lines: 71-74). Within this population, Zhu et al. found that CD58 and CD44 were upregulated using a cDNA GeneChip, and CD44<sup>(high)</sup>CD58<sup>(high)</sup> cancer cells, the common existence of which was demonstrated by flow cytometry in multiple colon cancer cell lines and primary specimens, exhibited enhanced self-renewal ability, epithelial-mesenchymal transition ability and tumorigenicity, both in vitro and in vivo. Furthermore, activated CD58 upregulated the Wnt/ $\beta$ -catenin pathway and thus promoted self-renewal of CT-ICs; conversely, knockdown of CD58 significantly impaired sphere formation and tumor growth. With immunoprecipitation and western blotting approaches, CD58 was found to upregulate the Wnt pathway by degradation of Dickkopf 3 (PMID: 24727892). This is consistent with the above results, our results indicated that CD58 could be used as an independent prognosticator for patients with glioma and could identify patients. CD58<sup>high</sup> glioma induce macrophages polarization through CXCL5 secretion, M2 macrophages also regulated the expression of PD-L1 in CD58<sup>high</sup> glioma via IL-6 production. Moreover, we found that PD-L1 expression was up-regulated in glioma and associated with IL-6/STAT3 signaling pathways activation. These results may shed light on the targets of CD58 in cancer and provide a possible predictive system to evaluate outcomes for patients with cancer.

Question 10: Finally, the language of this manuscript needs careful review by someone with expertise in English editing or whose native language is English, with particular attention paid to grammatical mistakes and sentence structure. For example, the sentence "CD58 was associated with NANOG, SOX2 and POU5F1 related stem cell associated gene expression was significantly higher in spheroids than in adherent monolayers" (line 116-117) appears to be quite confusing to read, and the sentence "To identify the potential mechanisms by which CD58 regulates gliomas" is not complete.

Answer: First of all, thank you very much for reading our article so carefully and giving comments of the article, we have made relevant language corrections due to relevant language writing errors, and we would like to thank you in particular for your

questions. We are also apologized for the lack of sentence in the article writing and after carefully checking the sentence related to the article

Reviewer #2 (Remarks to the Author):

In this manuscript, Bo Wu et al demonstrated that CD58 may contribute to the tumor cell stemness and recruit macrophages in glioma. However, this article has the following shortcomings:

Question 1: What about other immune cell infiltration in CD58<sup>high</sup> gliomas?

Answer: Thank you very much for your questions about the manuscript. We have considered this section carefully and believe that you are right (Lines: 255-263). For validating immune distribution of CD58, a CIBERSORT analysis on glioma was carried out. The results revealed that CD58 significantly reduced CD8<sup>+</sup> T cell infiltration into glioma tumors (Fig. 3A). Furthermore, CD3<sup>+</sup>T cells were cultured within conditioned medium of human GBM cells before collection after 4 days to conduct flow cytometry. To assess immunosuppressive nature of glioma, CD8<sup>+</sup> T cells were cultured with sh-CD58 or OE-CD58 glioma cells. In the present functional test, CD8<sup>+</sup> T cell proliferation was significantly impaired when co-cultured with OE-CD58 glioma cells (Fig. 3B-E). Thus, CD58 reprogrammed glioma cells into immunosuppressive states.

In addition, the correlation between CD58 and immune cells was analyzed by bioinformatics analysis, and the results showed that CD58 significantly inhibited T cell function and promoted macrophage polarization, which further validated our results, suggesting that CD58 inhibited T cell proliferation through the interaction with macrophages.

Question 2: How could CD58 regulate the stem cell genes need to illustrate.

Answer: First of all, thank you very much for reading our article so carefully and giving comments on some details of the article (Lines 229-253).

The exact role of CD58 in glioma is poorly explored. For analyzing the effect of CD58 on glioma, GSEA was initially carried out on glioma database through classifying glioma patients as two groups based on median CD58 level (CD58<sup>high</sup> vs. CD58<sup>low</sup>). Relative to CD58<sup>low</sup>, CD58<sup>high</sup> glioma showed the significantly enriched genes associated with stem cells (Fig. 2A). Additionally, CD58, and additional several stemness-related genes (NANOG, SOX2, POU5F1), in particular SOX2, remarkably increased in spheres in comparison with adjacent monolayer cells (Fig. 2B), thereby suggesting an association between CD58 and cancer stemness in glioma. Aldehyde dehydrogenase A1 (ALDH1) serves as the extensively identified and operative stemness marker. CD58<sup>high</sup> cells showed enhanced ALDH activity relative to CD58<sup>low</sup> cells within several glioma cell lines (Fig. 2C). To gain further insights into these distinct populations of glioma, flow cytometry was carried out for purifying glioma cells according to CD58 level. Based on quantitative RT-PCR assay, key stemness gene (NANOG, SOX2, and POU5F1) levels increased within CD58<sup>high</sup> cells relative to CD58<sup>low</sup> cells (Fig. 2D). For elucidating the signaling pathway potentially related to regulating CD58 expression, U251 and U313 cells were exposed to Wnt, Notch, and Hedgehog (Gliand Hippo (YAP1) pathways-specific inhibitors. According to our findings, just YAP1 inhibitors were able to partly down-regulate CD58<sup>high</sup> (Fig. 2E), suggesting potential involvement of Hippo-YAP pathways in regulating CD90 level within glioma. When equal numbers of cells (1 × 10<sup>6</sup>) were inoculated into BLAB/C mice, the CD58<sup>high</sup> cells displayed accelerated tumor formation compared to CD58<sup>low</sup> cells (Fig. 2F, G). We also performed survival analysis to estimate the frequency of tumor-initiating cells in the CD58<sup>high</sup> and CD58<sup>low</sup> cells populations (Fig. 2H). Thus, CD58<sup>high</sup> cells represent glioma with tumorigenic potential. Collectively, CD58 may be the marker for glioma.

In this part, we highlight the role of CD58 in regulating the stemness of glioma, and clarify the important role of hippo pathway in CD58-mediated stemness. This article mainly discusses the regulation of CD58 on tumor immune microenvironment, but the mechanism of CD58 regulating tumor stem cells is not studied in detail. We hope that future research can make up for this part.

This article also has the following minor shortcomings:

Question 3: All the methods used in this paper should be indicated in detail, including the database, cell and spheroid culturing and treatment, animal model,



statistics and so on.

Question 4: Results need to be explained in detail and more clearly.

Question 7: Discussion is too simple. It needs to clarify in detail and logically.

Answer: Thank you very much for reading our article so carefully and giving comments of the article, we have made relevant method, results, and discussion sections, and we would like to thank you in particular for your questions. We are also apologized for the lack of the database, cell and spheroid culturing and treatment, animal model, statistics in the article writing and after carefully checking the results, and discussion section related to the article.

Question 5: In Fig 5A, author need to compare the difference between normal and glioma tissue.

Answer: Thank you very much for reading our article so carefully and giving comments of the article, we would like to thank you in particular for your questions. We add results to compare the difference between normal and glioma tissue (Lines 283-285). To further validate the distribution of CD58, we performed IF double staining on glioma. The results of IF double staining in glioma revealed that macrophage cells were more abundant in glioma tissues than normal tissues (Fig. 5D).

Question 6: What's the meaning of "ALDH+DEAB" and "DEAB"? Why ALDH activity increase after DEAB treatment?

Answer: Thank you very much for reading our article so carefully and giving comments on some details of the article, and we have made corrections due to relevant fuzzy description figure, and we would like to thank you in particular for your questions. Aldehyde dehydrogenase A1 (ALDH1) is an operative and well-recognized stemness marker. Diethylaminobenzaldehyde (DEAB) is a reversible competitive inhibitor of ALDH1 (which competes with aldehyde groups) with  $K_i$  of 4nm and irreversibly inactivates ALDH1 by forming stable covalent acylase species. We found that CD58high cells exhibited higher ALDH activity than CD58low cells in multiple glioma cell lines.

Version 1:

Reviewer comments:

Reviewer #1

(Remarks to the Author)

Reviewer #2

(Remarks to the Author)

Version 2:

Author Rebuttal letter:

1- We noticed that several figures in the revised manuscript have been replaced with new figures, but no explanation was provided for these changes. We therefore request that you 1) thoroughly describe any changes made to the original figures (manuscript version: COMMSBIO-22-4030A; 2) explain why each figure was replaced; 3) explain how and whether the figure changes affect the results shown.

Answer: In the uploaded manuscript, compared to the manuscript (COMMSBIO-22-4030A; 2), there have been the following changes to the images of the results: Figure 1B; Figure 1F; Figure 2E; Figure 2F (HE); Figure 4C; Figure 4D; Figure 6D; Figure 6E; Figure 7B; Figure 7C; Figure 7D.

Among these changes in the results, Figure 1F; Figure 2E; Figure 4C; Figure 4D; Figure 7B; and Figure 7D are protein images. In the preliminary experiments we conducted earlier, some results were from pre-experiments, and due to budgetary

considerations, some proteins were not processed according to the full blot standard, while the images shown in our manuscript (COMMSBIO-22-4030A; 2) are all results from these preliminary experiments. However, since the journal requires protein results to be based on full blots, and our later experiments were completed according to the full blot standard, we considered replacing these results to better match the outcomes. We apologize for any inconvenience this may have caused you. Similarly, we have replaced the flow cytometry images, Figure 6D and Figure 7B, because after our examination and comparison, we discovered issues with the display errors of the images, and in order to ensure the quality of the article, we have therefore replaced the images.

In addition, we have removed the result of Figure 1B from manuscript (COMMSBIO-22-4030A; 2) due to layout adjustments that may affect the layout, but this optimization of the layout does not impact the overall results of the article. The HE result in Figure 2F has been replaced with a clearer outcome to increase the readability of the article.

We assure that the replacement of the above images will not affect the quality and results of the article. On the contrary, these replacements can enhance the readability and quality of the article. However, we sincerely apologize for these issues and any inconvenience they may have caused you.

2- It is unclear whether the original western blot images provided comply with our guidelines and match the cropped images included in the main manuscript figures. Please pay close attention to our Digital Image Integrity Guidelines (<https://www.nature.com/nature-portfolio/editorial-policies/image-integrity>) and to the following points below, making any appropriate changes to the documents provided:

• that unprocessed scans are clearly labelled and match the gels and western blots presented in figures (please annotate the original blots to indicate which specific figure panel they correspond to).

Answer: In the provided original western blot files, we have increased the original images and the triple repeat results for the proteins in the results, and have detailed them accordingly.

• that control panels for gels and western blots are appropriately described as loading or sample processing controls.

Answer: During all western blot procedures, we prepared 12% gels, and the electrophoresis and transfer were performed according to the instructions, ensuring there was no human interference and avoidable errors during the operation.

• all images in the paper are checked for duplication of panels and for splicing of gel lanes.

Answer: After our examination, we have verified all the images in the paper to ensure that there are no duplications or spliced lanes in the results.

Version 3:

Reviewer comments:

Reviewer #3

(Remarks to the Author)

The research demonstrated that CD58 expression represents a promising approach for identifying patients who can benefit from immunotherapy. However, there are still some issues that need to be addressed and resolved in this study.

1. The scatter plots for Figure 2G and Figure 7E should be provided.

2. The manuscript lacks experimental elucidation of the mechanism between CD58 and PD-L1. Is there an interaction between these two molecules?

3. The manuscript lacks specific experimental explanation for the mechanism of how PD-L1 expression changes after CD58 knockdown or overexpression in cell lines with high or low CD58 expression. This part is also puzzling.

4. It is suggested including a schematic diagram to illustrate the proposed mechanism.

Author Rebuttal letter:

Reviewer #3:

The research demonstrated that CD58 expression represents a promising approach for

identifying patients who can benefit from immunotherapy. However, there are still some issues that need to be addressed and resolved in this study.

1.The scatter plots for Figure 2G and Figure 7E should be provided.

Answer: Thank you for your valuable feedback. We have thoroughly reviewed your suggestions and have made the necessary adjustments by replacing the statistical charts in Figures 2G and 7E to ensure compliance with the specified criteria. Your input is greatly appreciated.

2.The manuscript lacks experimental elucidation of the mechanism between CD58 and PD-L1. Is there an interaction between these two molecules?

Answer: Thank you for your valuable input on the mechanism section. Prior to this, we explored the direct interaction between CD58 and PD-L1. Our immunoprecipitation analysis revealed no direct interaction between CD58 and PD-L1 in glioma cells. The results are presented below. We hypothesize that CD58's regulation of PD-L1 is mediated through cellular communication.

3.The manuscript lacks specific experimental explanation for the mechanism of how PD-L1 expression changes after CD58 knockdown or overexpression in cell lines with high or low CD58 expression. This part is also puzzling.

4.It is suggested including a schematic diagram to illustrate the proposed mechanism.

Answer: We express our sincere gratitude for your invaluable feedback. Our research centers on the cellular interactions, particularly discerning that tumor cells exhibiting elevated CD58 expression attract macrophages, resulting in macrophage polarization and IL-6 secretion to enhance PD-L1 expression in tumor cells. Nevertheless, a thorough examination of the presence of CD58 within tumor cells for regulating PD-L1 expression at the transcriptional or protein level has not been conducted. We perceive this as a pivotal focus for our forthcoming research endeavors. Your input holds significant importance and will play a critical role in shaping our future studies.

Schematic diagram

Figure legend:

CD58<sup>high</sup> glioma induces macrophage polarization through CXCL5 secretion, which in turn regulates

PD-L1 expression within CD58high glioma via IL-6 production.

**Open Access** This Peer Review File is licensed under a Creative Commons Attribution 4.0 International License, which permits use, sharing, adaptation, distribution and reproduction in any medium or format, as long as you give appropriate credit to the original author(s) and the source, provide a link to the Creative Commons license, and indicate if changes were made.

In cases where reviewers are anonymous, credit should be given to 'Anonymous Referee' and the source.

The images or other third party material in this Peer Review File are included in the article's Creative Commons license, unless indicated otherwise in a credit line to the material. If material is not included in the article's Creative Commons license and your intended use is not permitted by statutory regulation or exceeds the permitted use, you will need to obtain permission directly from the copyright holder.

To view a copy of this license, visit <https://creativecommons.org/licenses/by/4.0/>
